# Supplementary material for: Synthesis and biological evaluation of novel 2-morpholino-4-anilinoquinoline derivatives as antitumor agents against HepG2 cell line
Source: Royal Society of Chemistry journal article supplement (doi:10.1039/d3ra07495a), 2024-01-01

AN1  
H-NMR

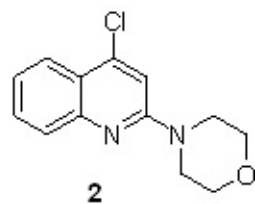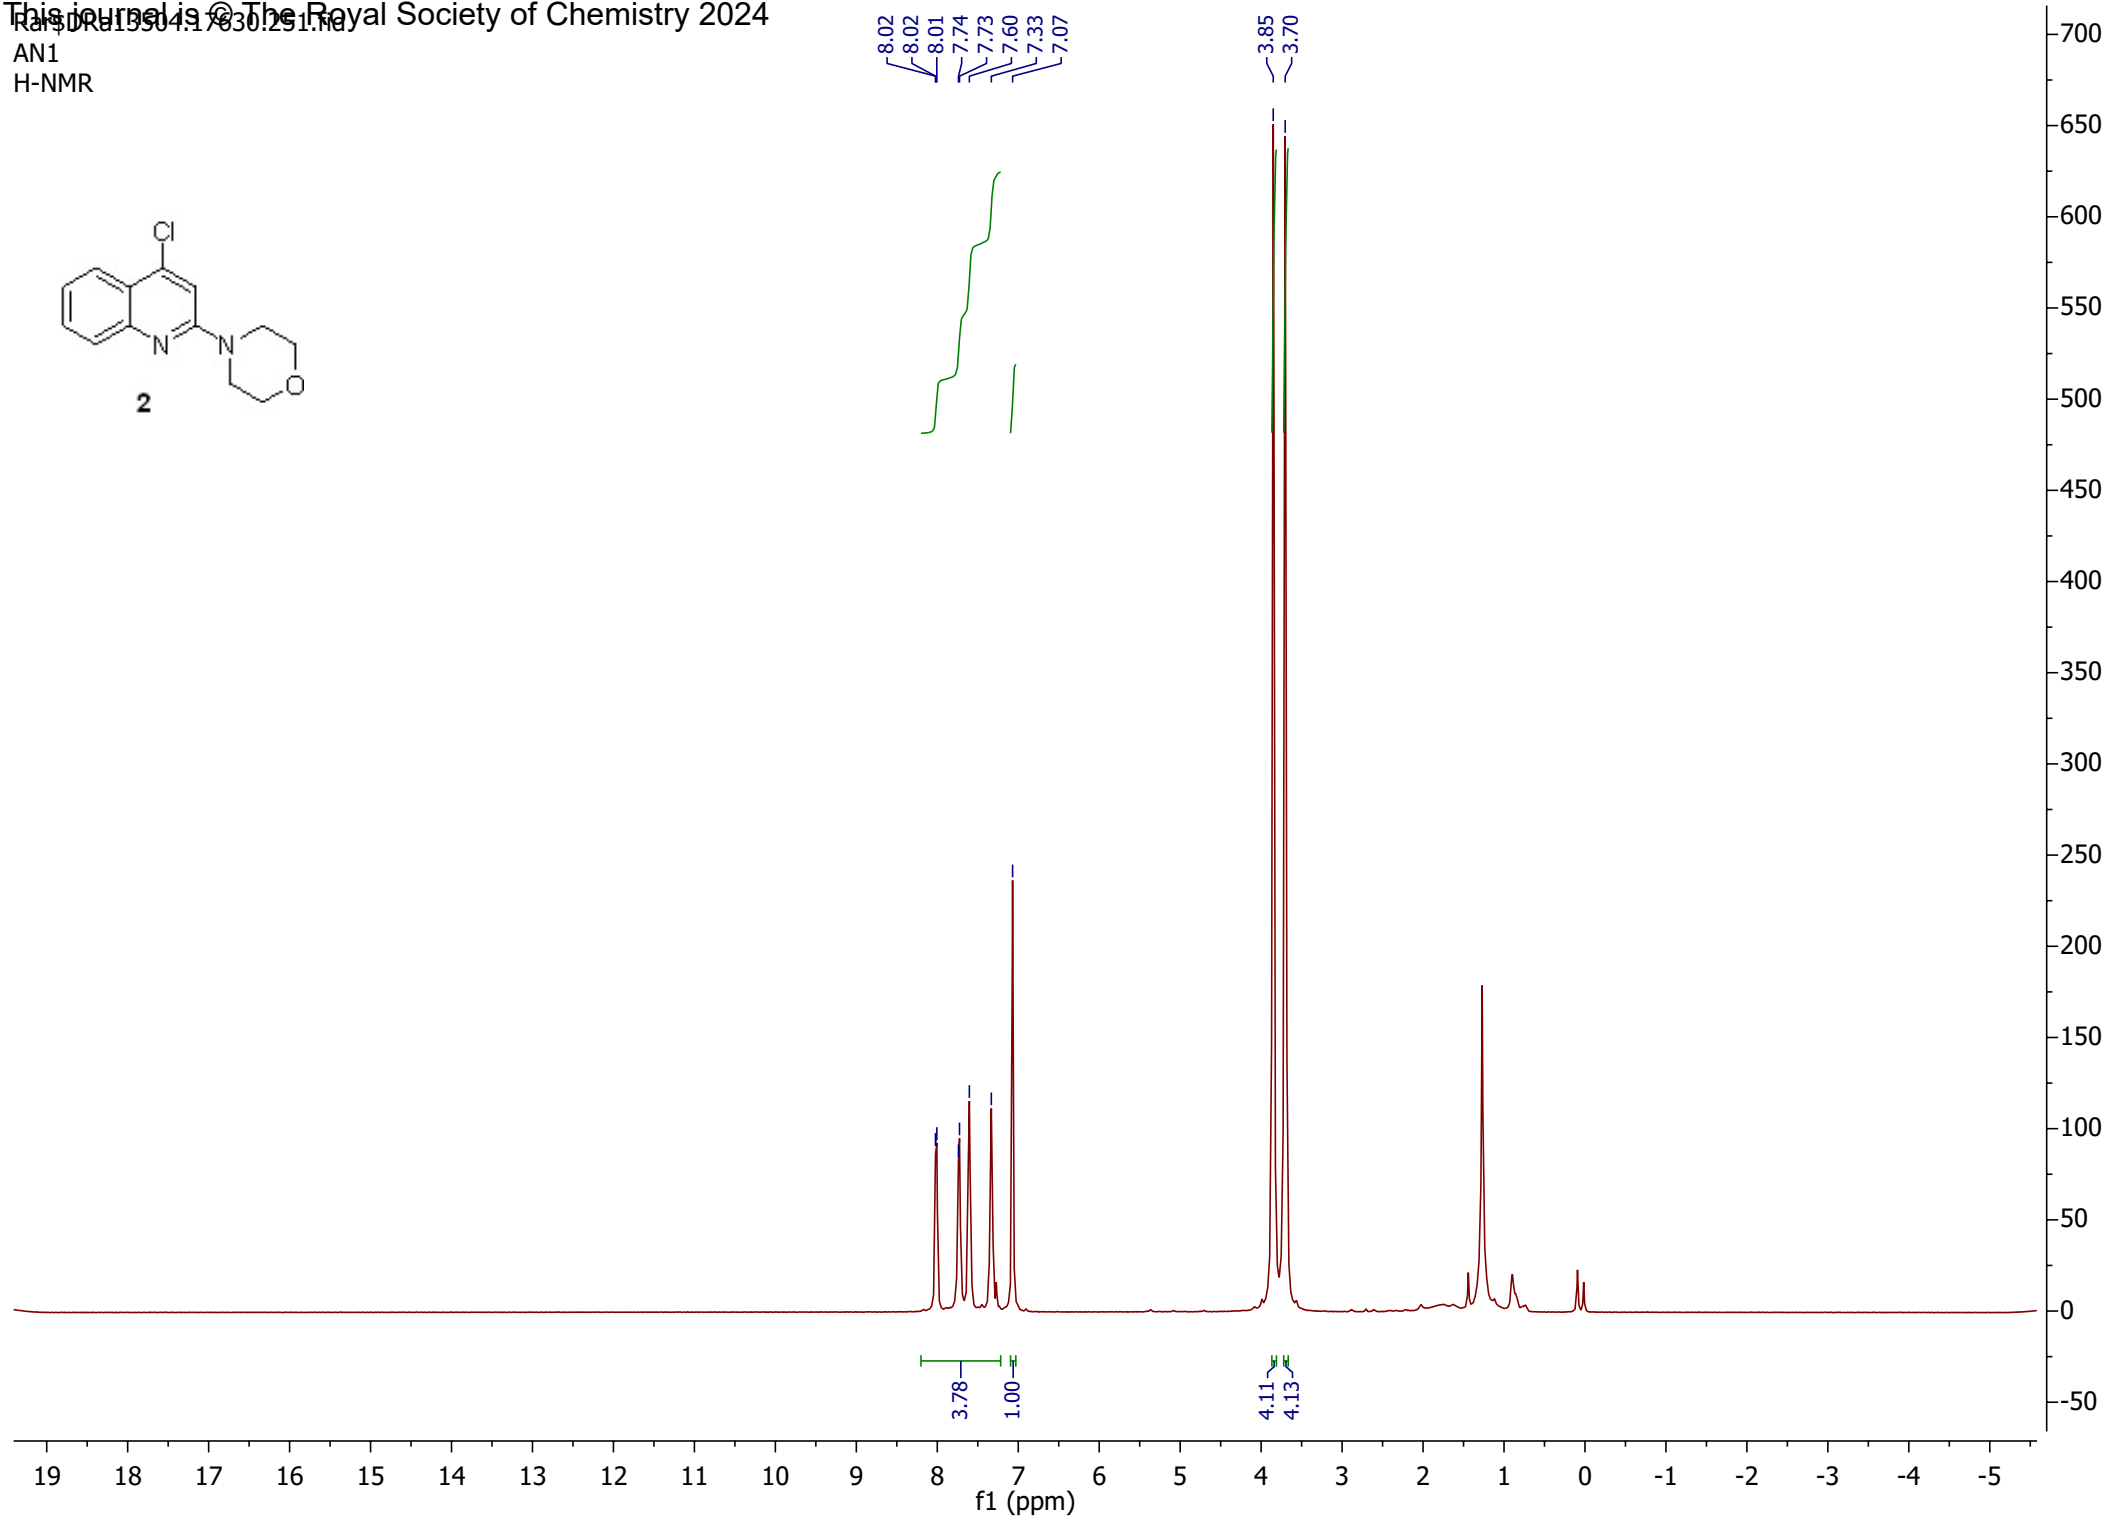

Rar\$DRa13504.47065.252.fid  
AN1  
C13-NMR

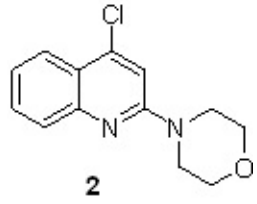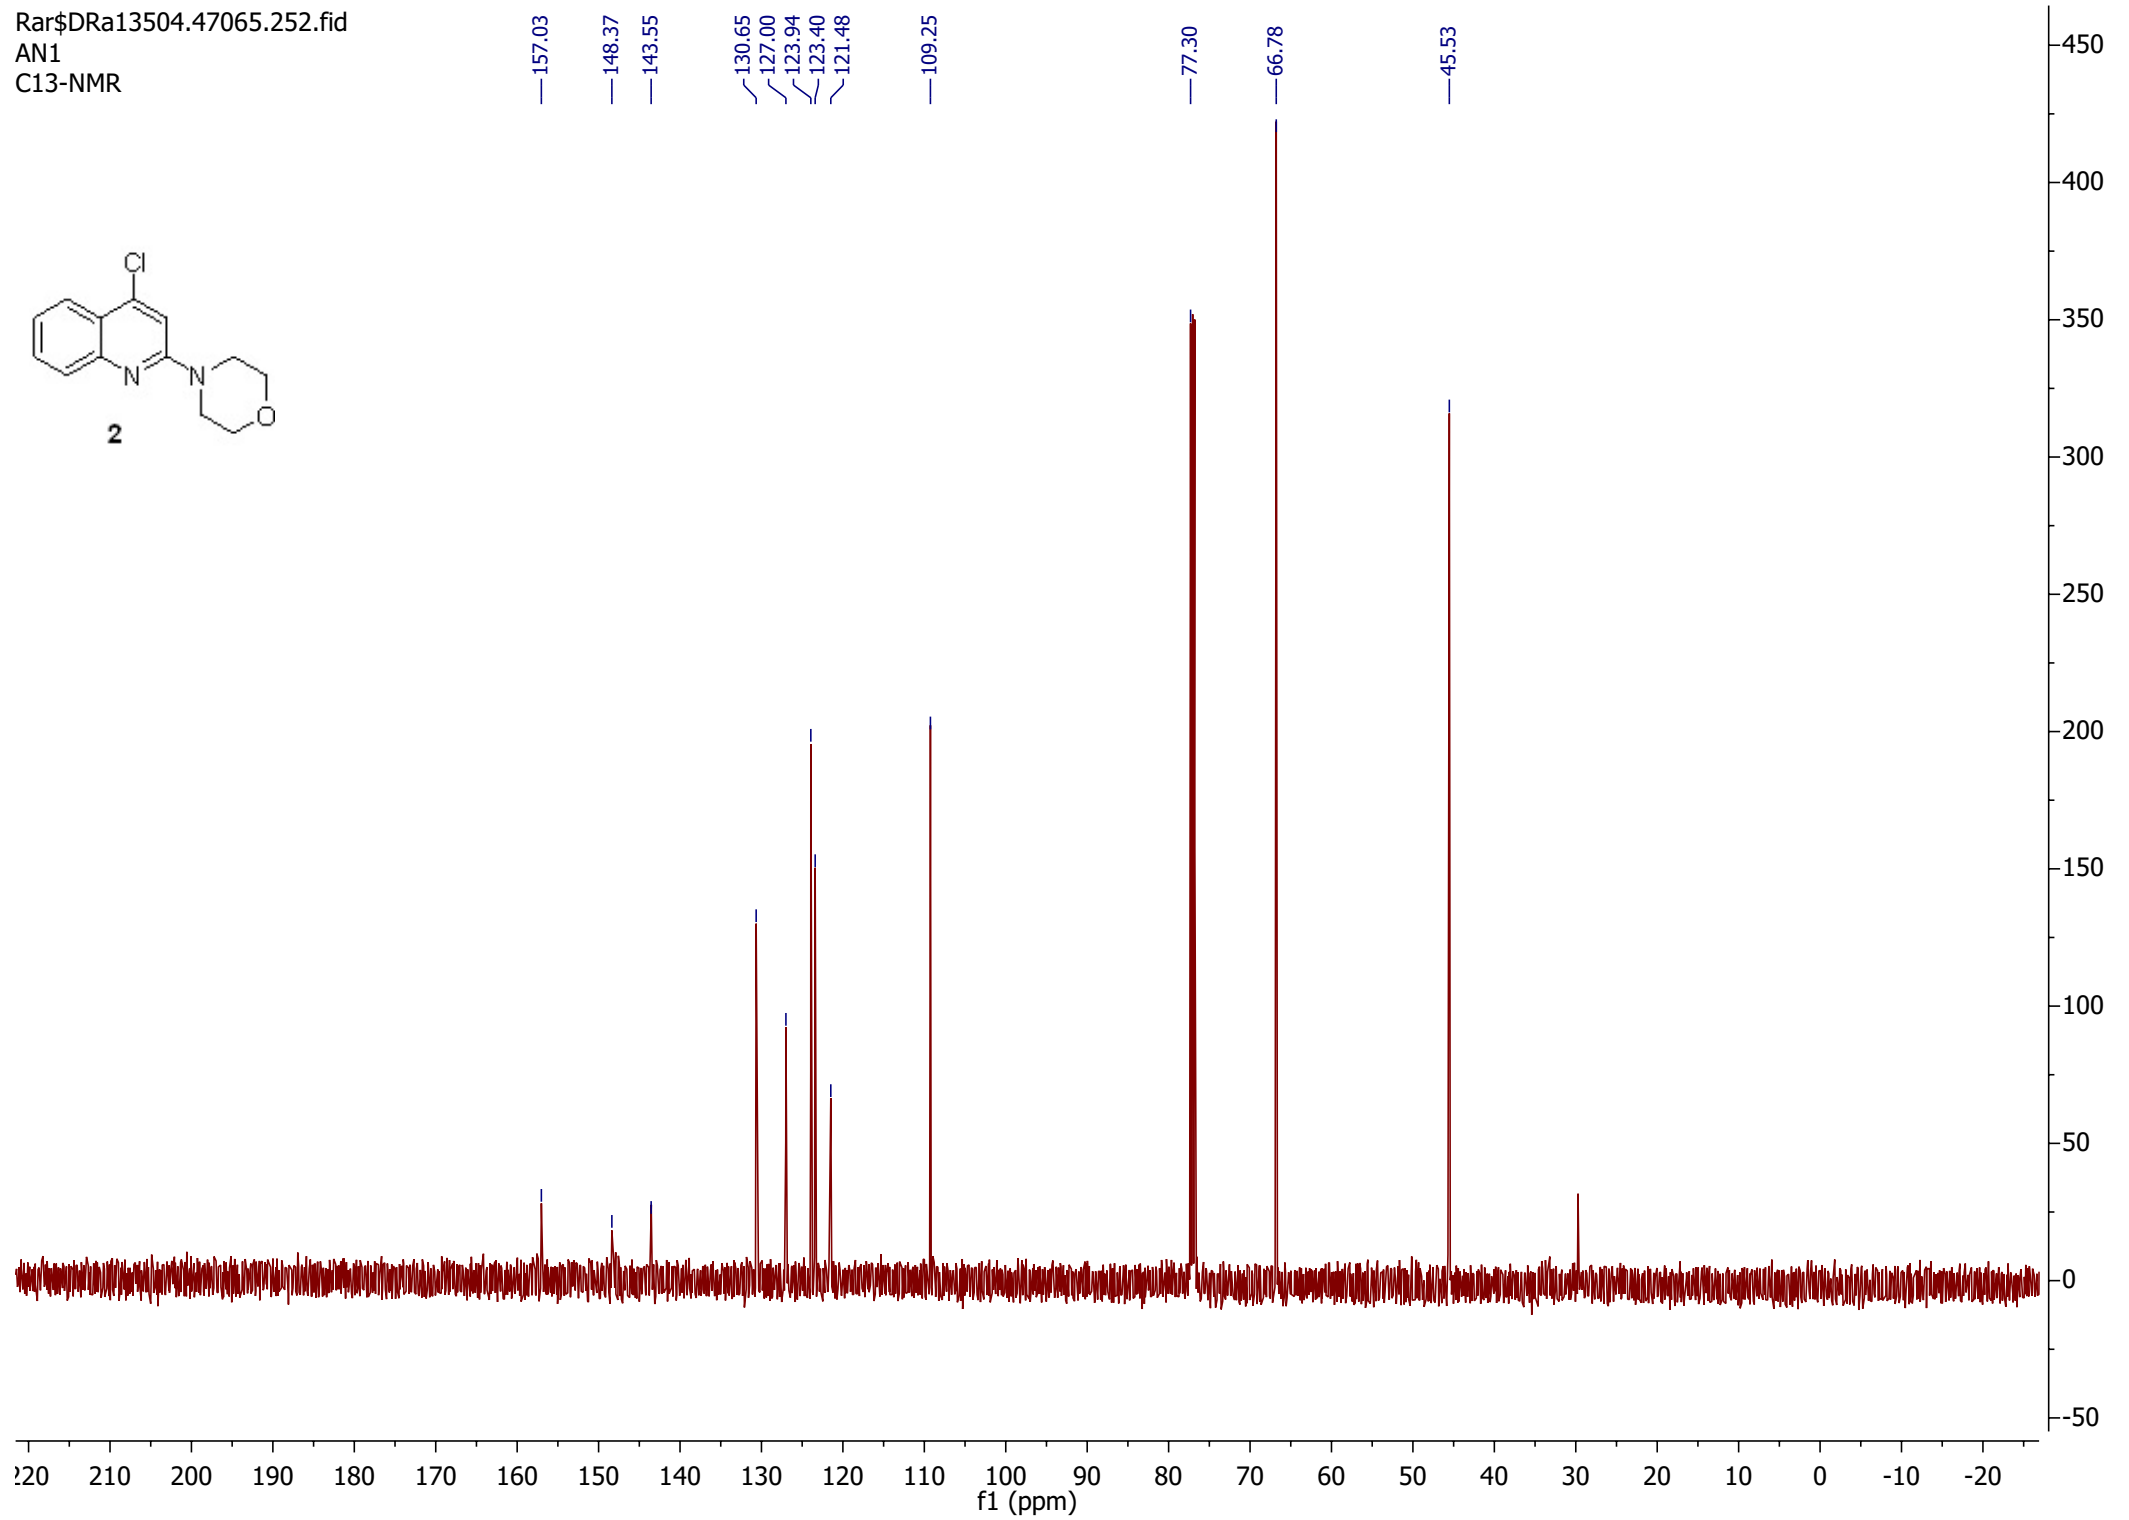

Rar\$DRa13504.18687.211.fid  
AN5  
H-NMR

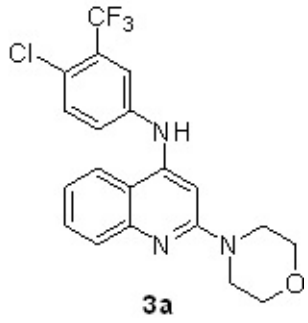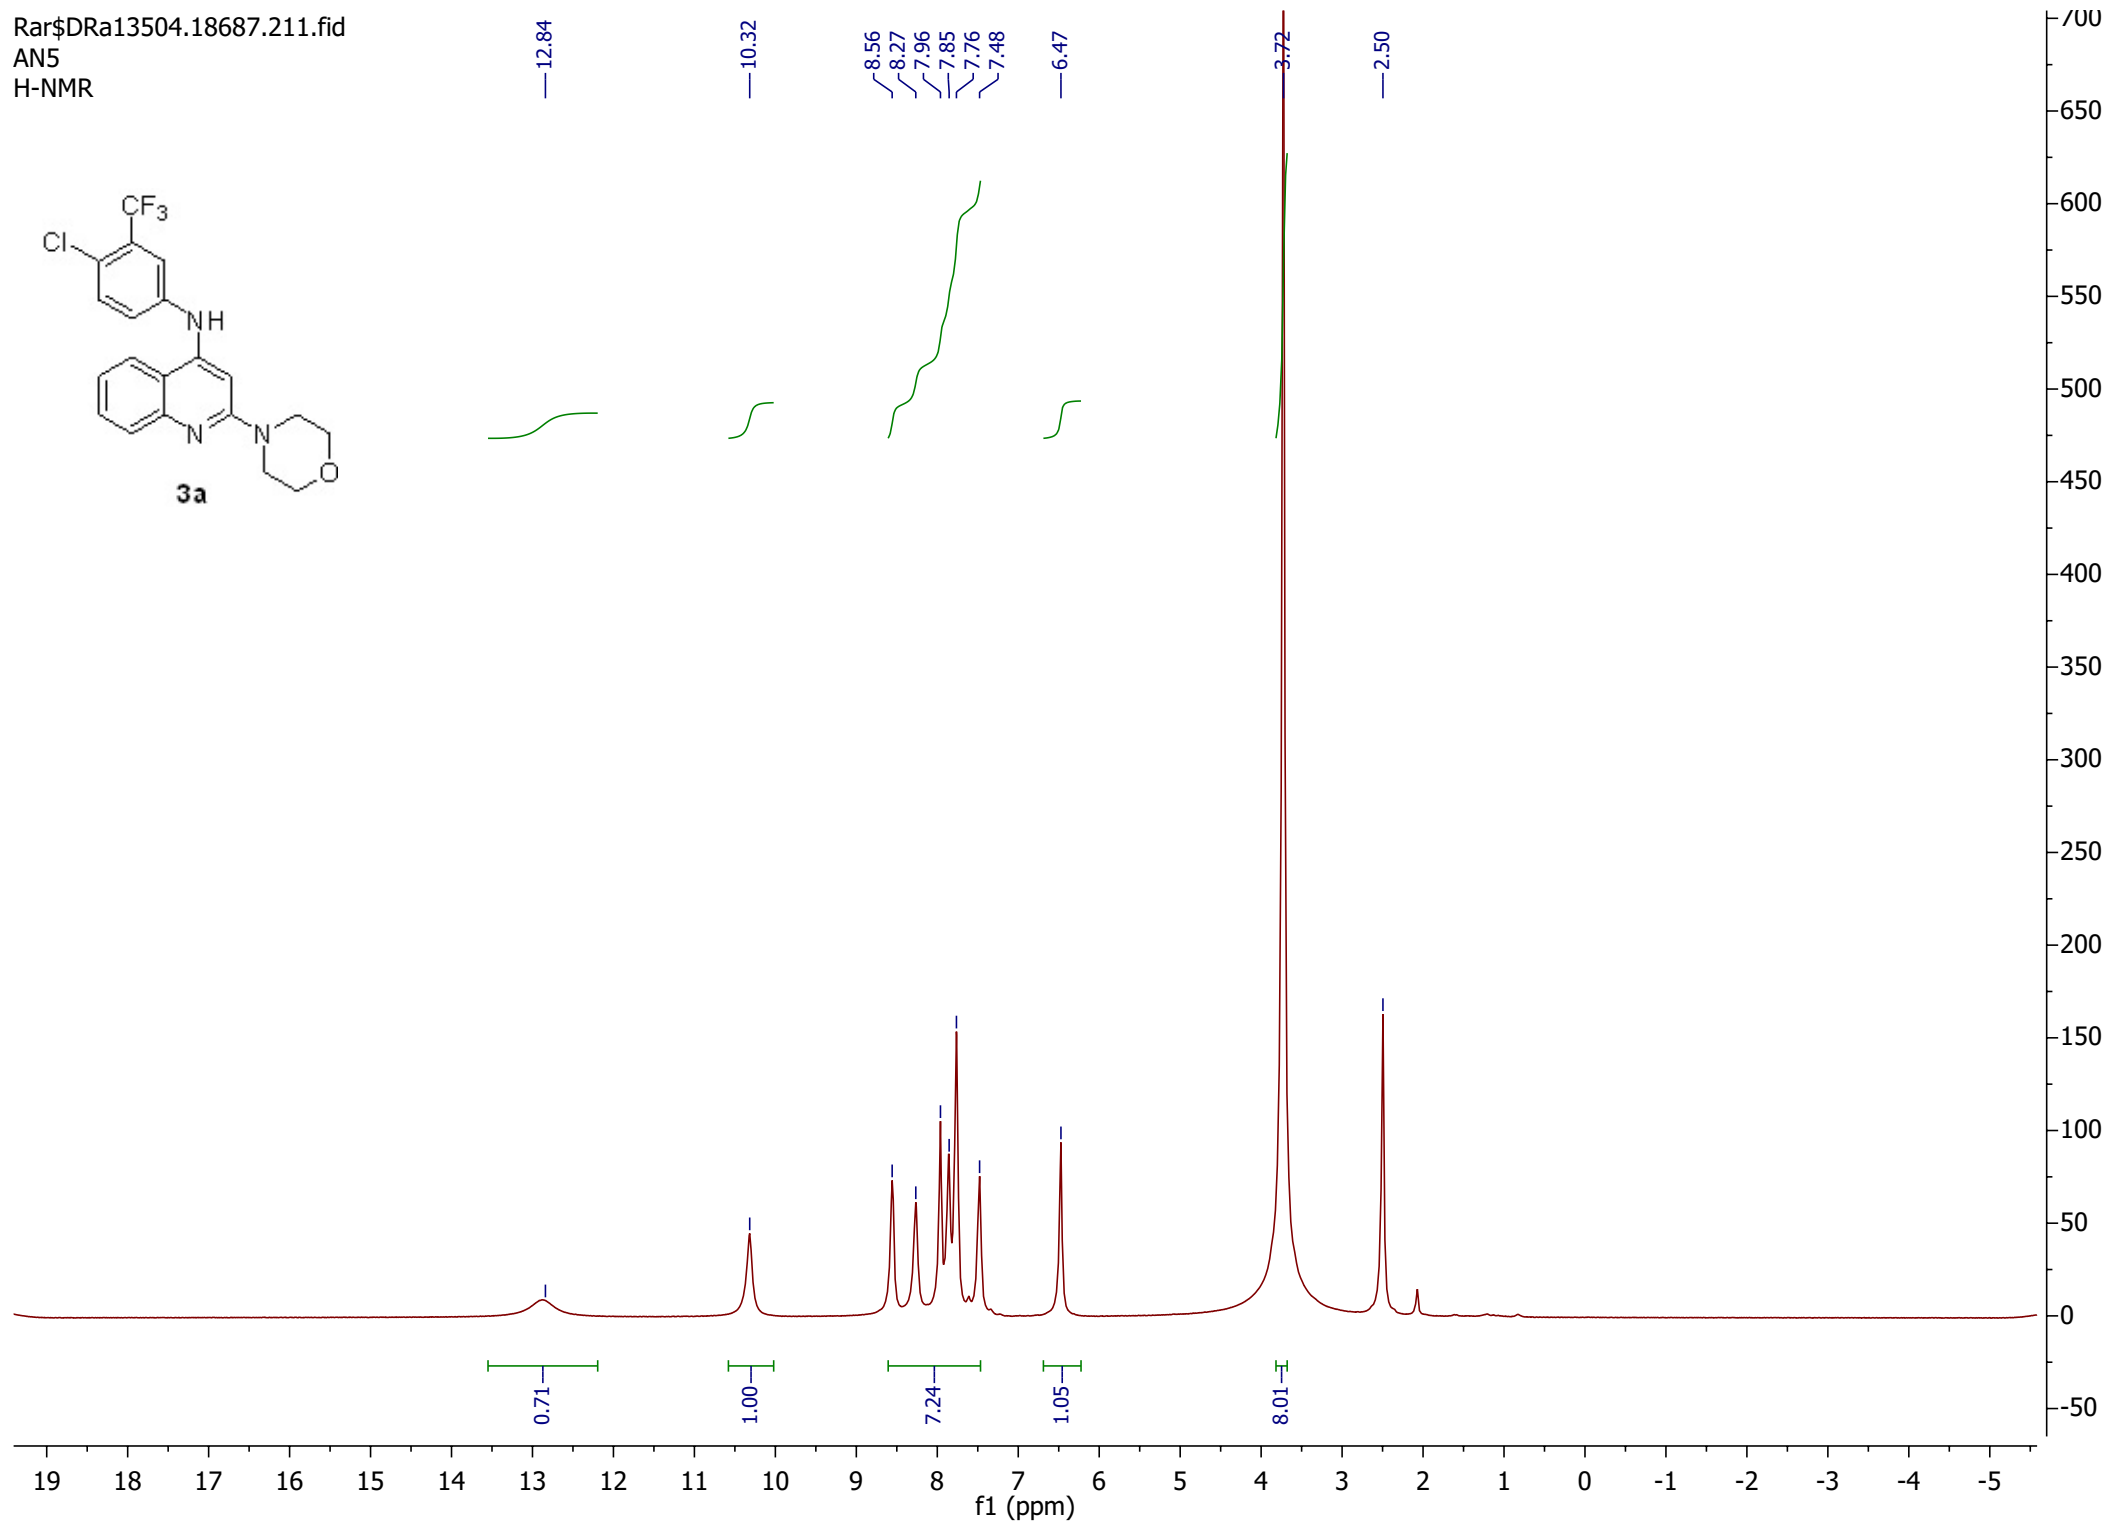

Rar\$DRa13504.45839.212.fid  
AN5  
C13-NMR

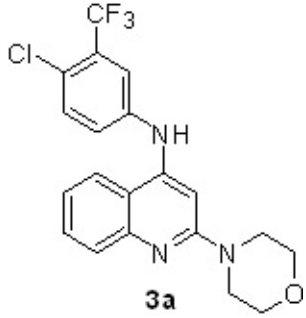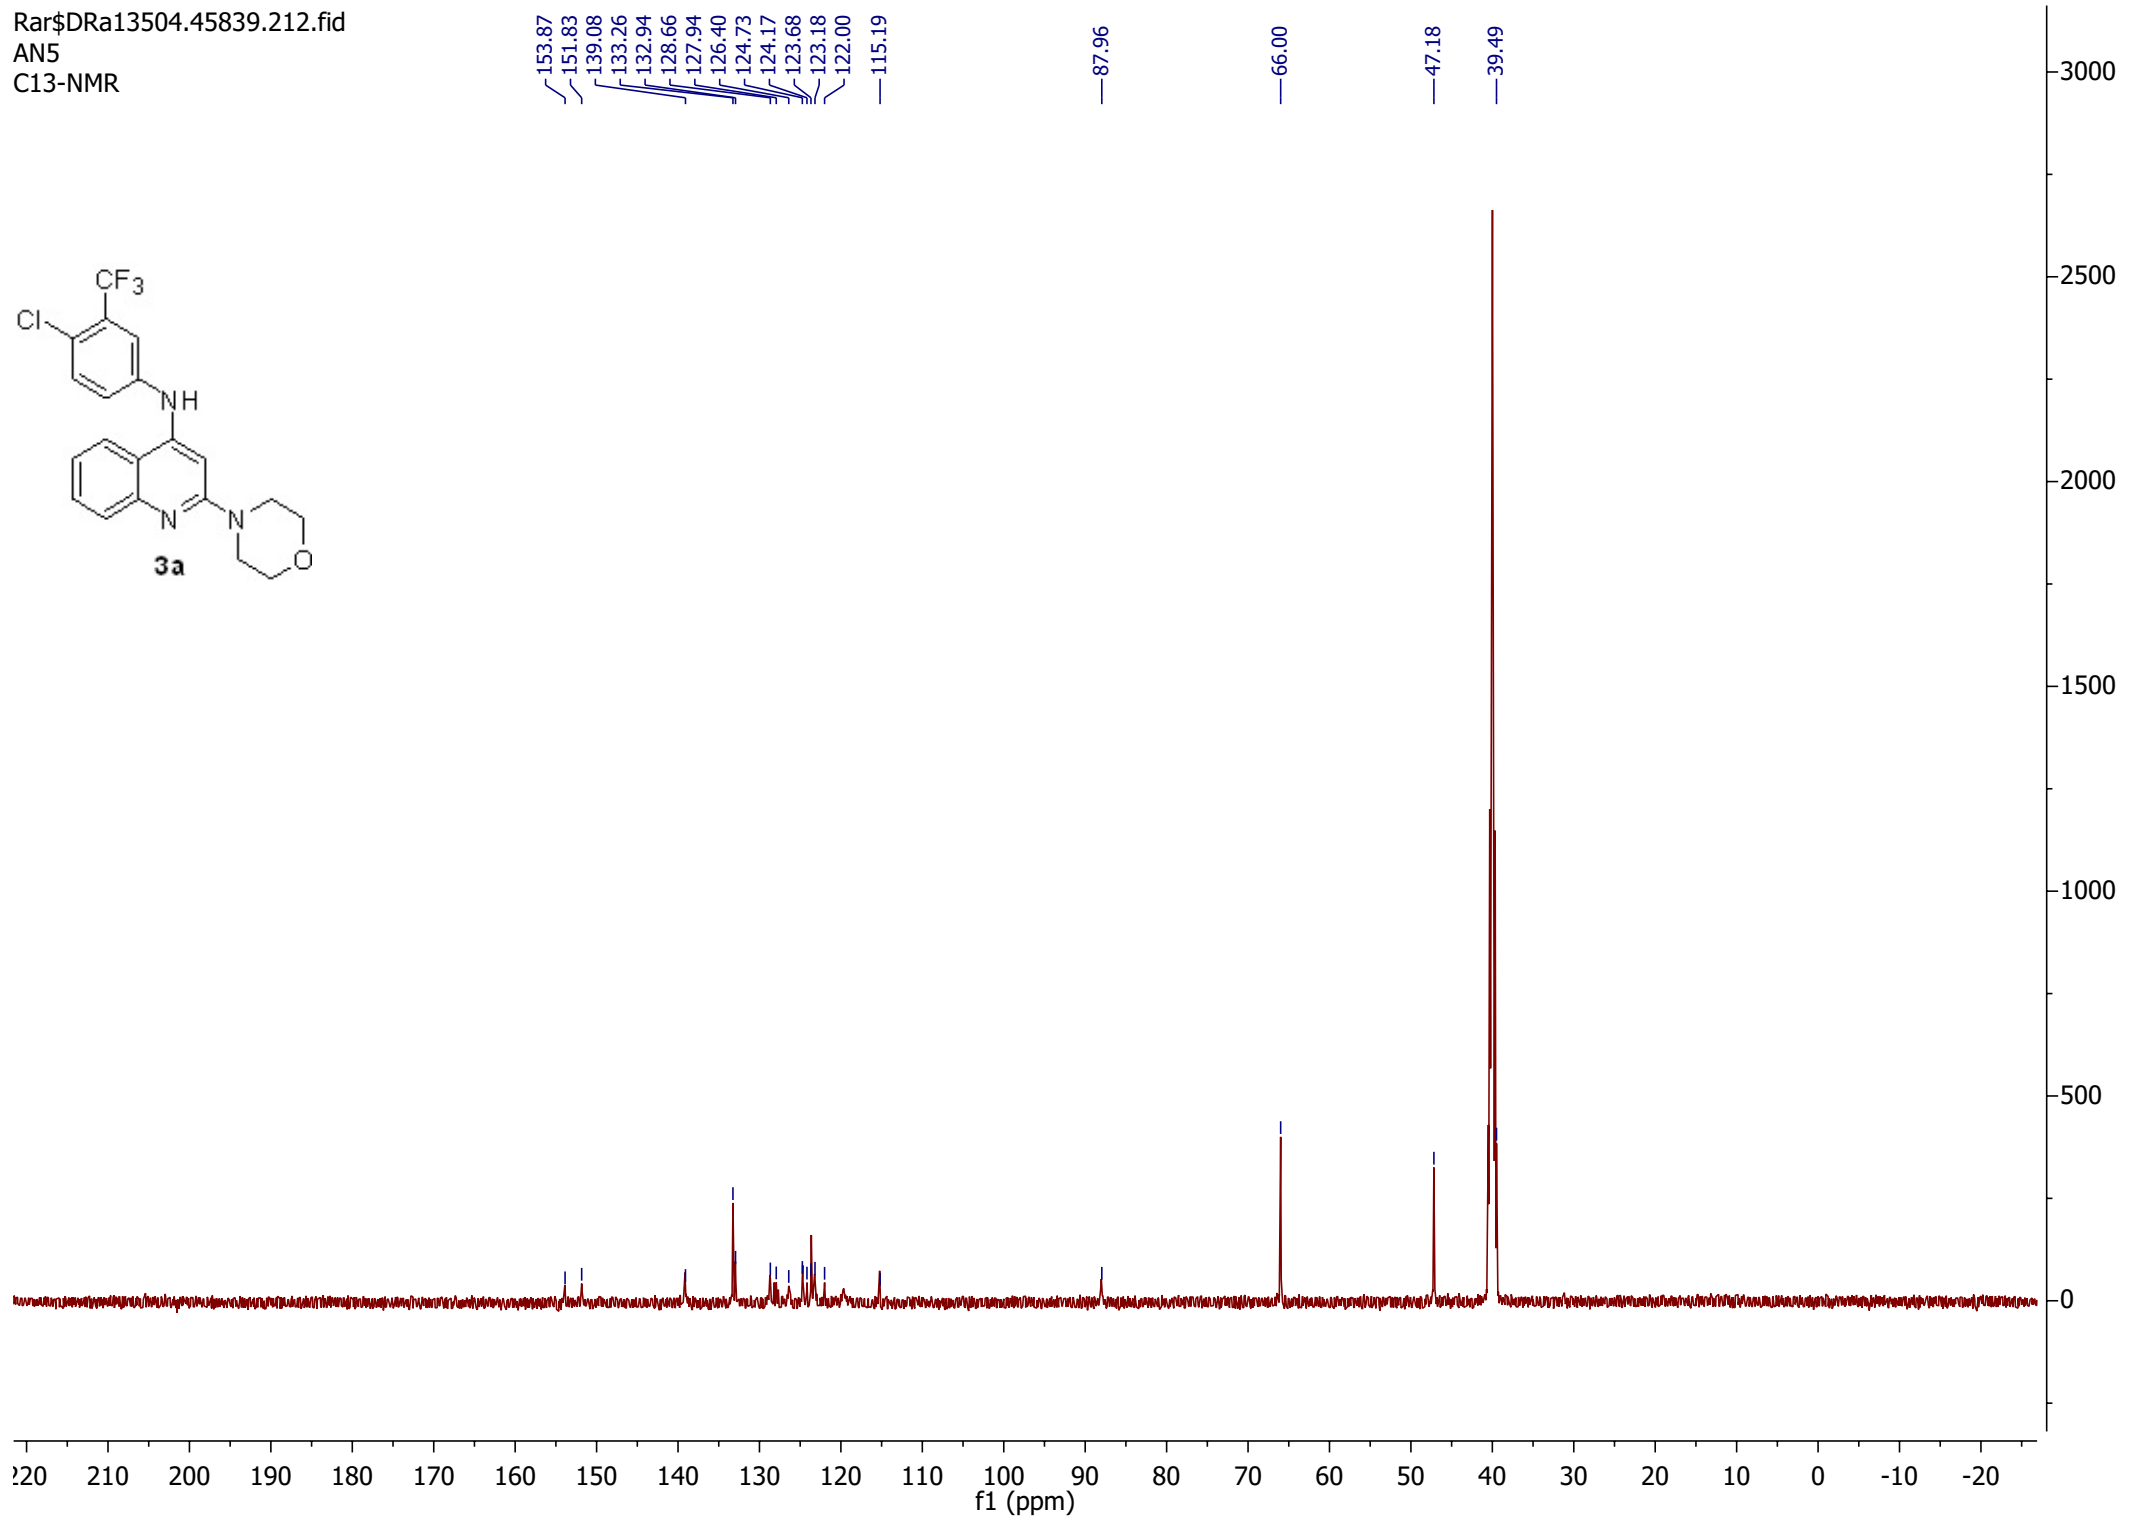

Rar\$DRa13504.35618.241.fid  
AN6  
H-NMR

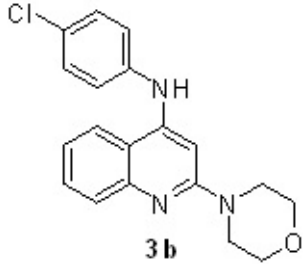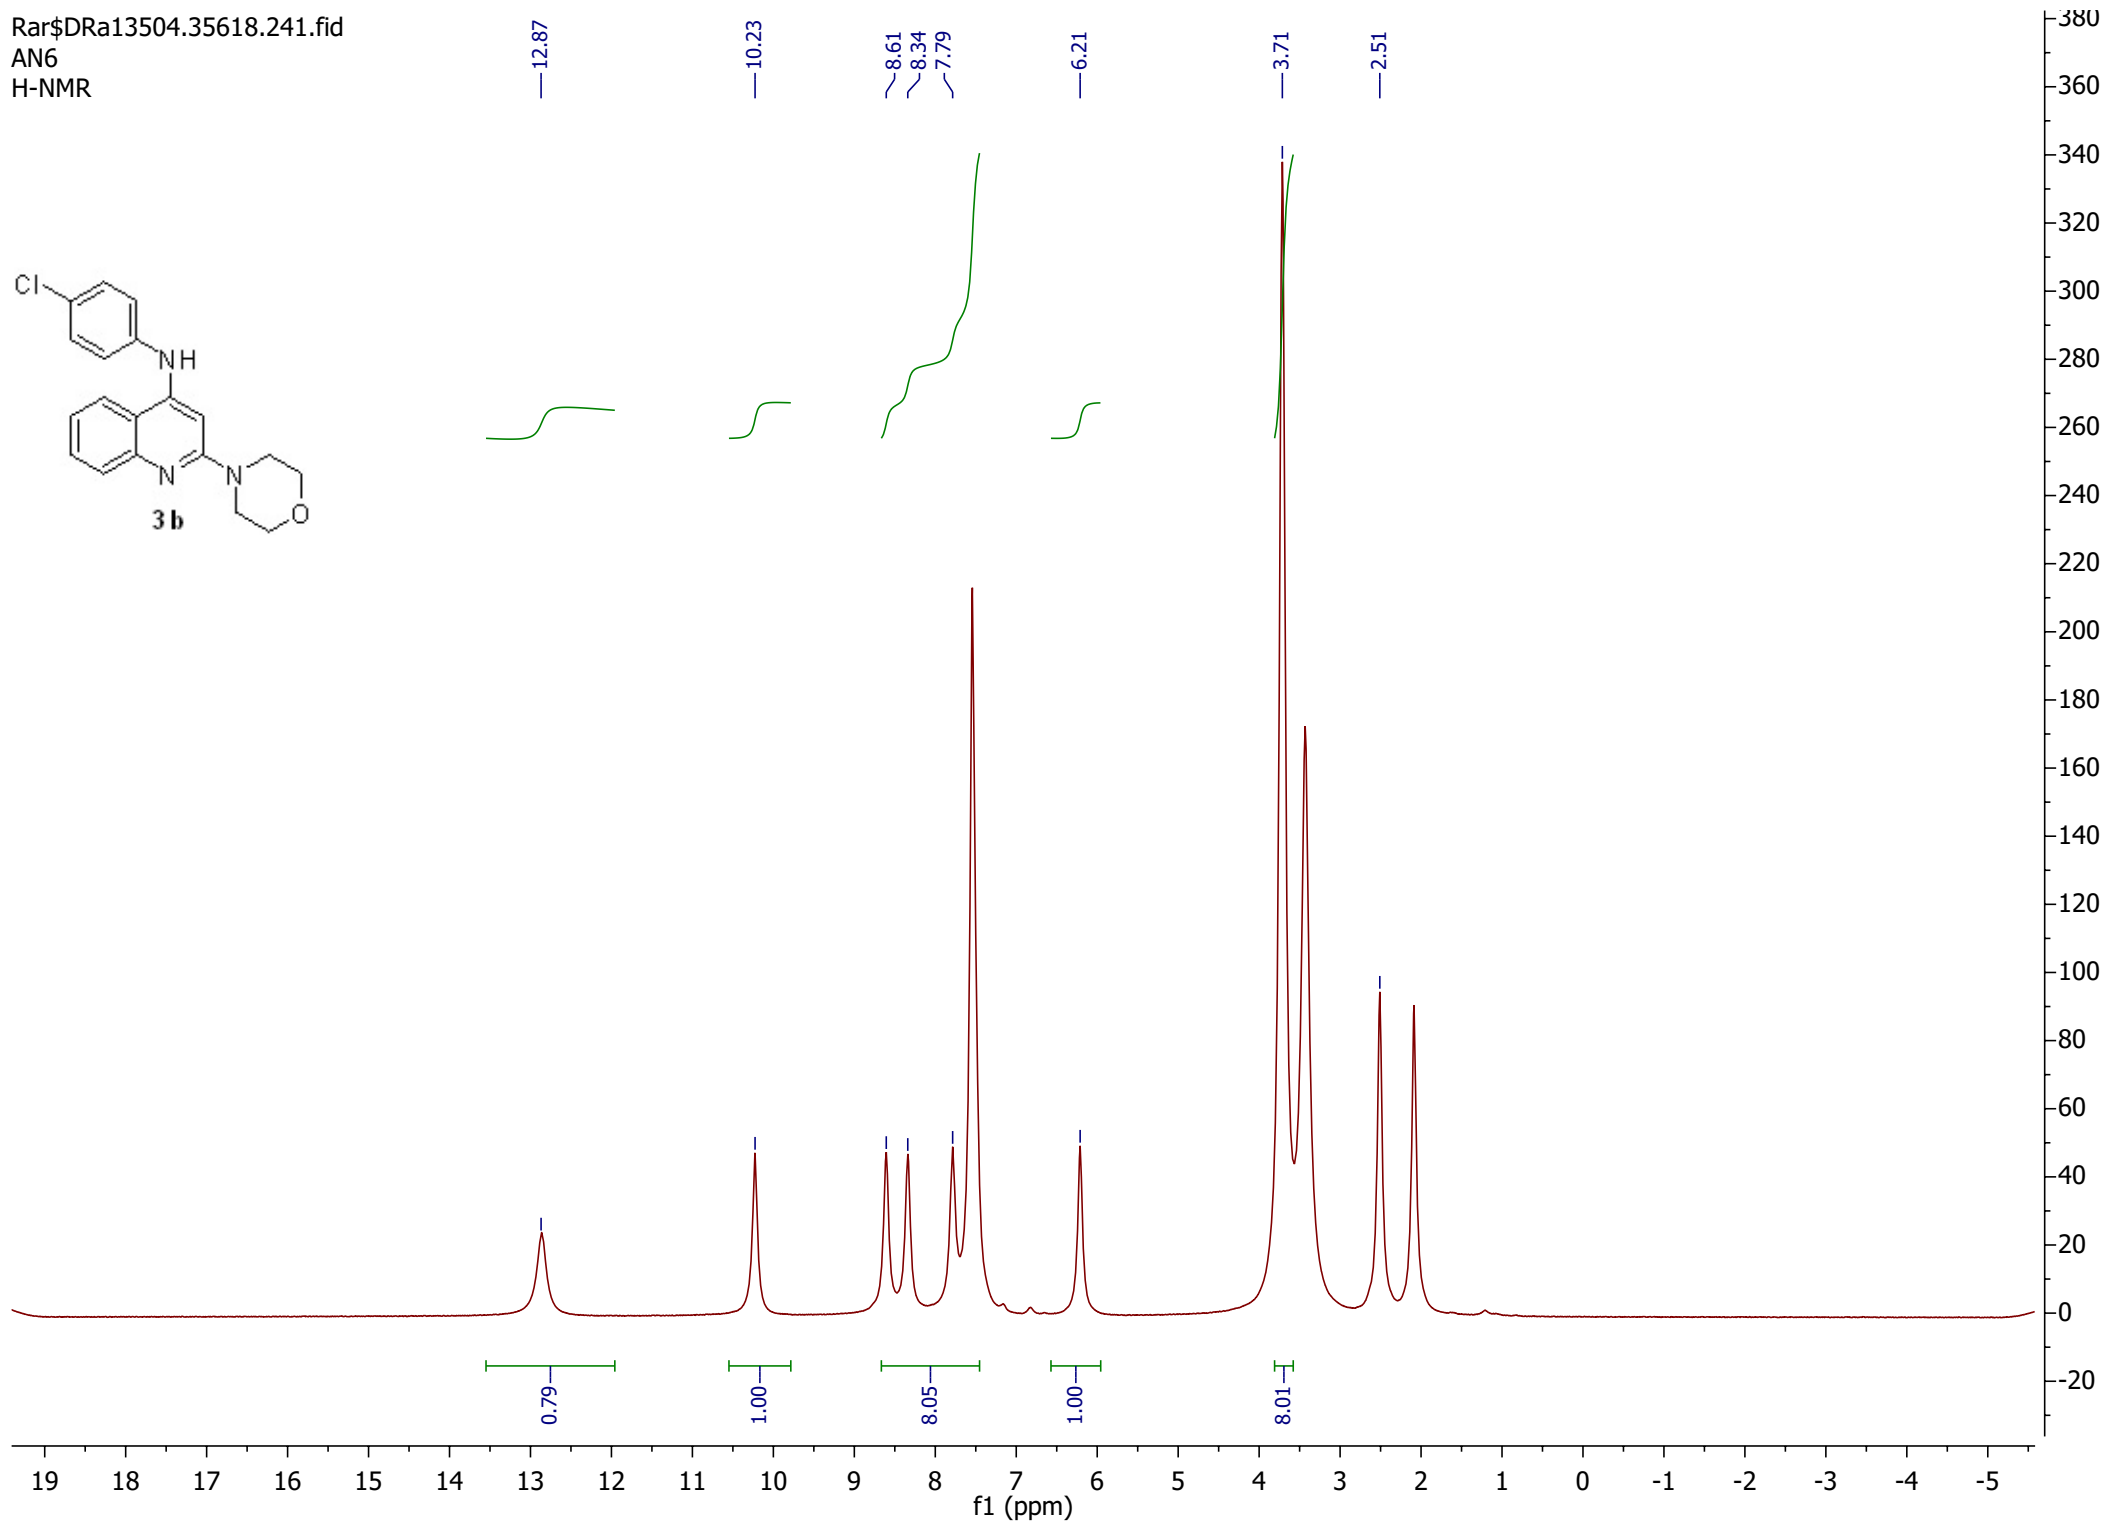

Rar\$DRa13504.9844.242.fid  
AN6  
C13-NMR

153.66  
152.81  
138.46  
137.70  
133.10  
130.37  
130.12  
126.70  
124.87  
123.61  
119.15  
114.84  
86.12  
65.94  
47.18

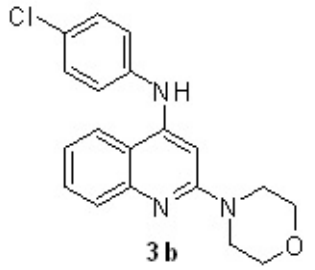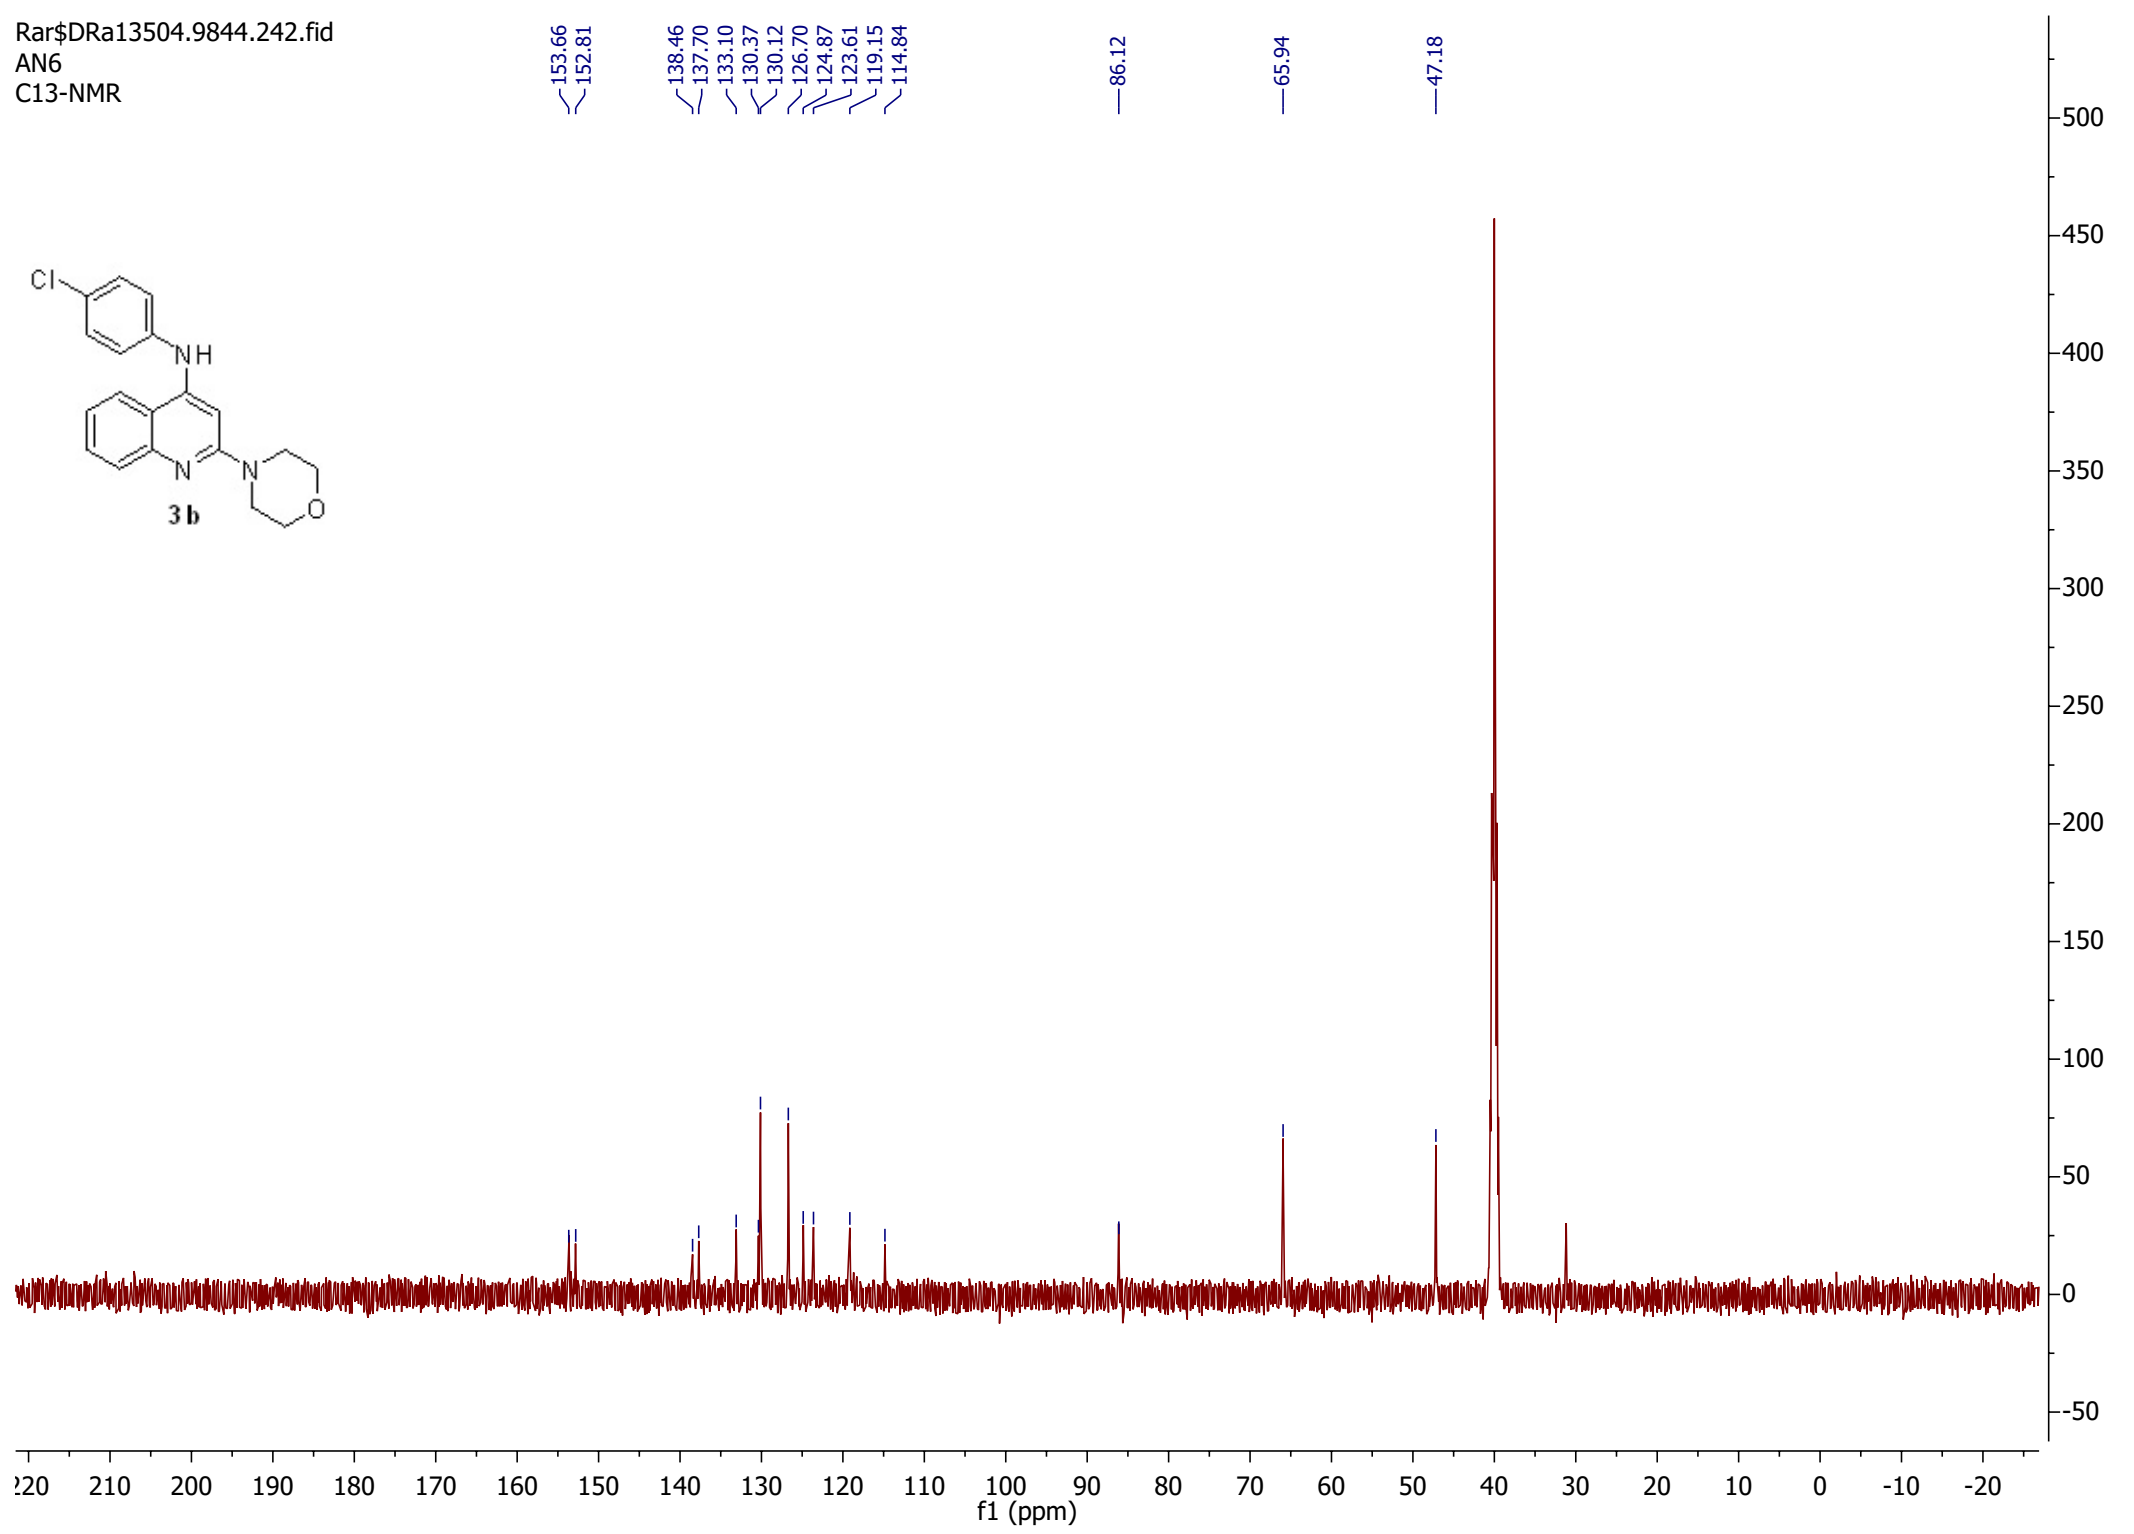

\$DRa13504.18315.191.fid  
AN7  
H-NMR

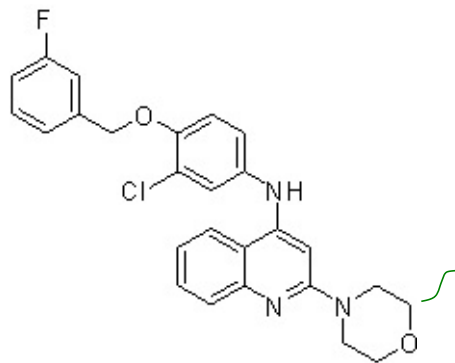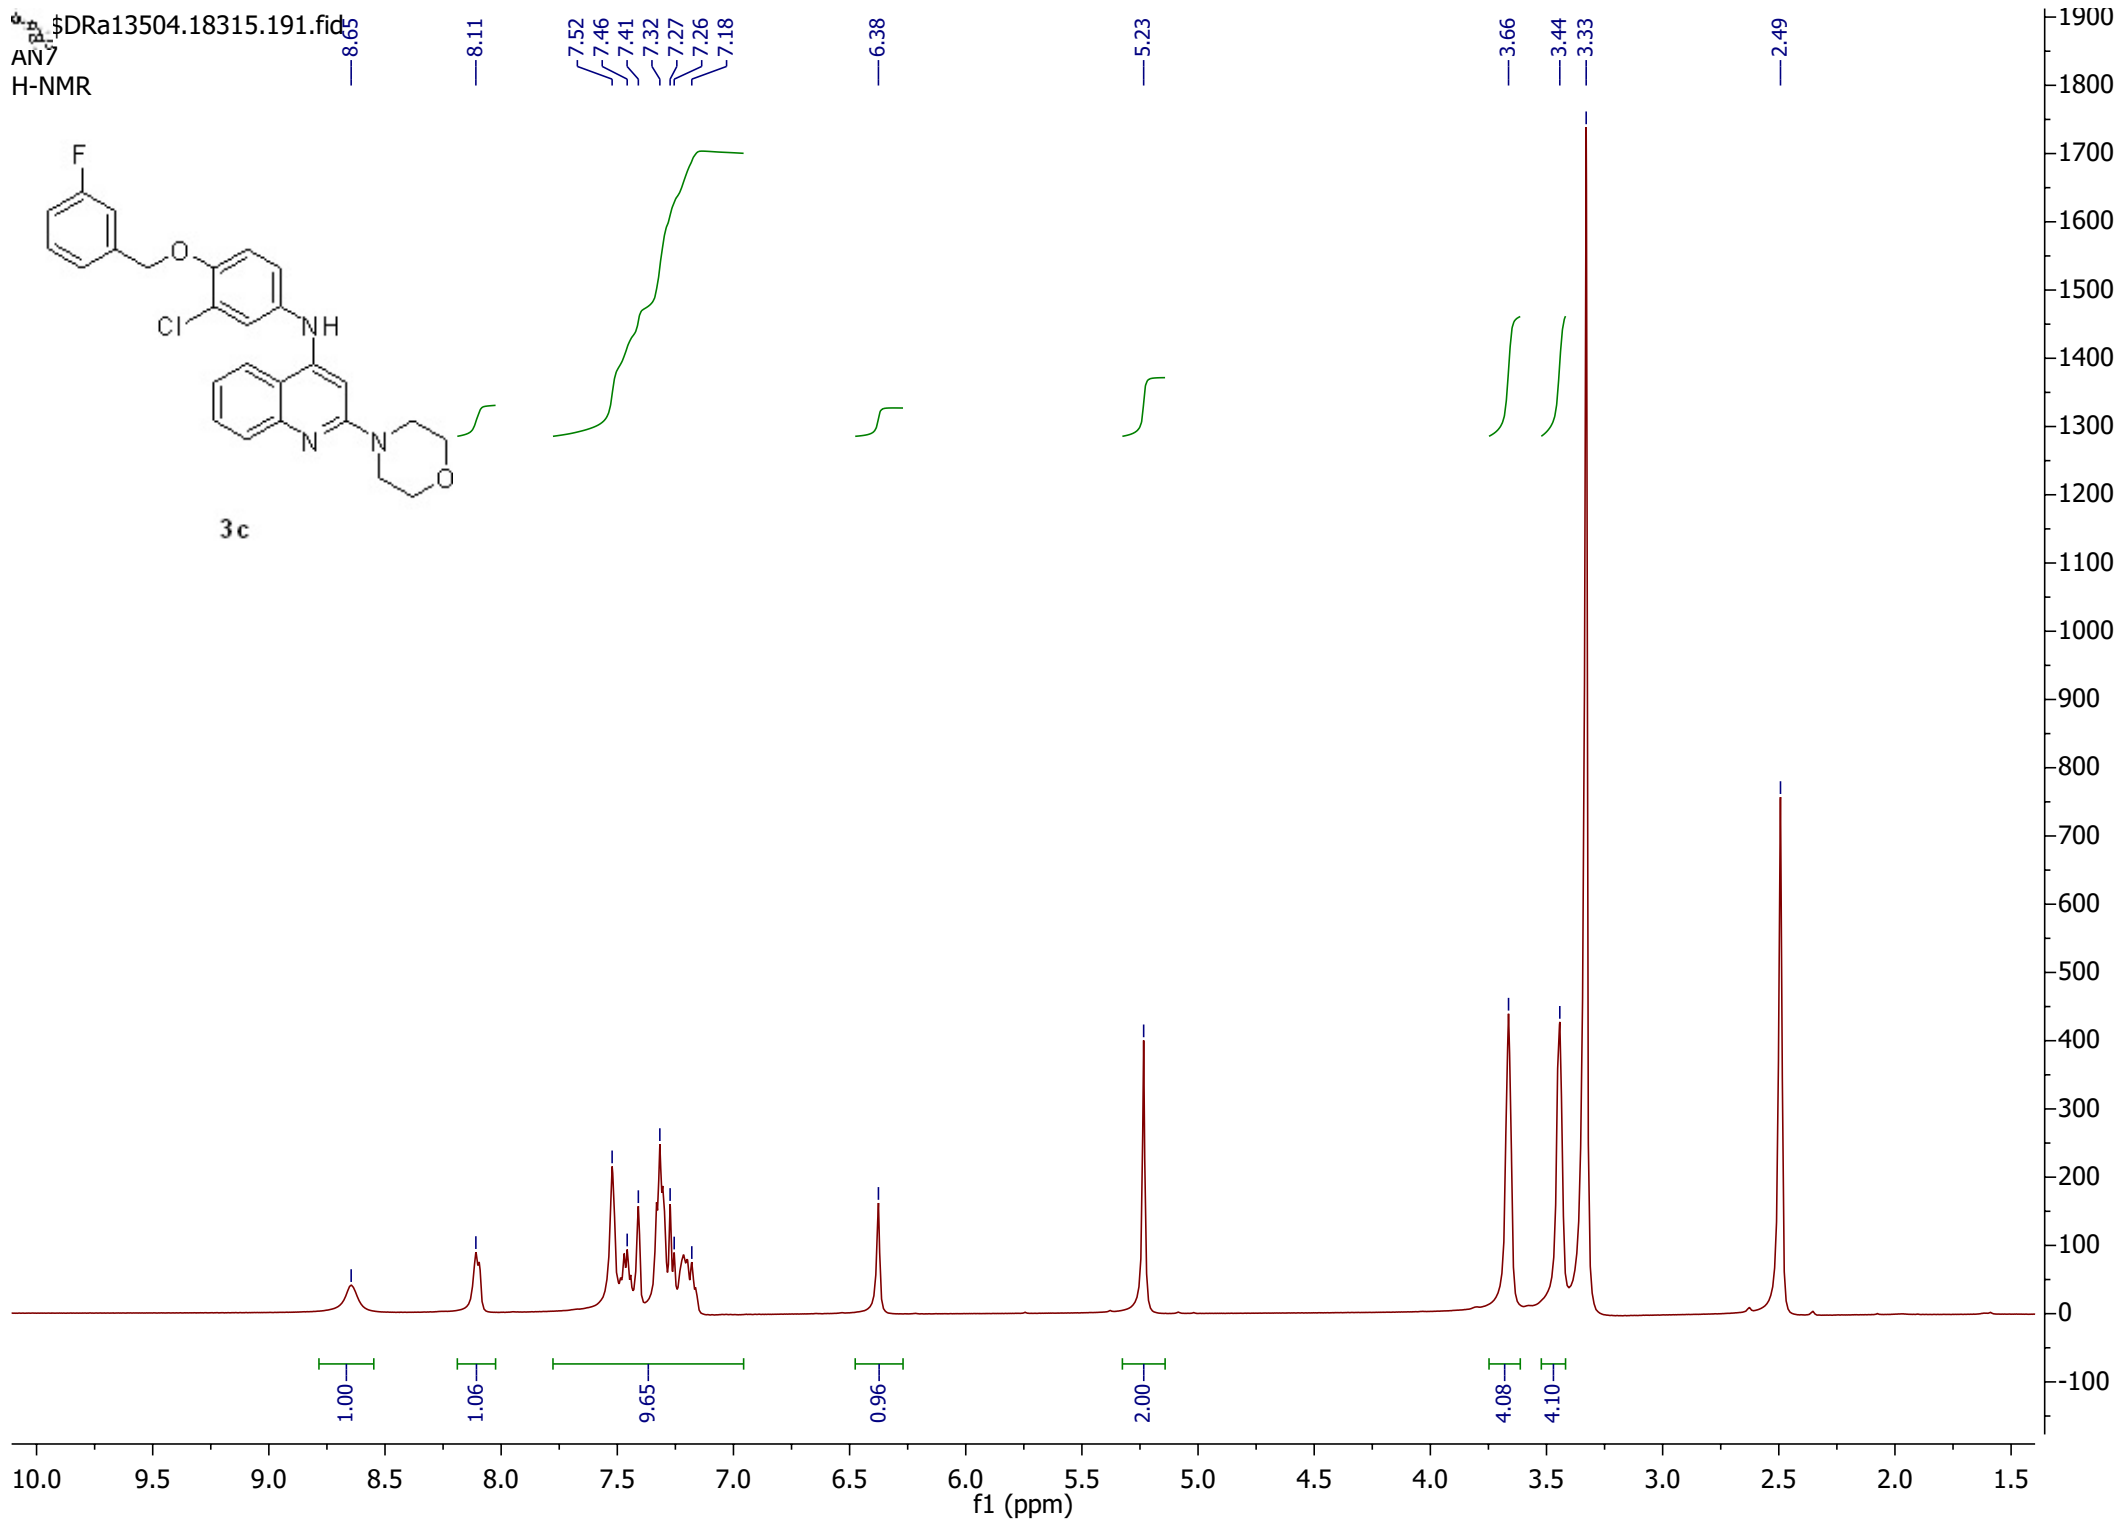

Rar\$DRa13504.1168.192.fid  
AN7  
C13-NMR

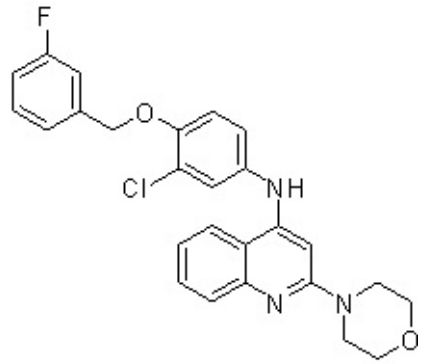

3c

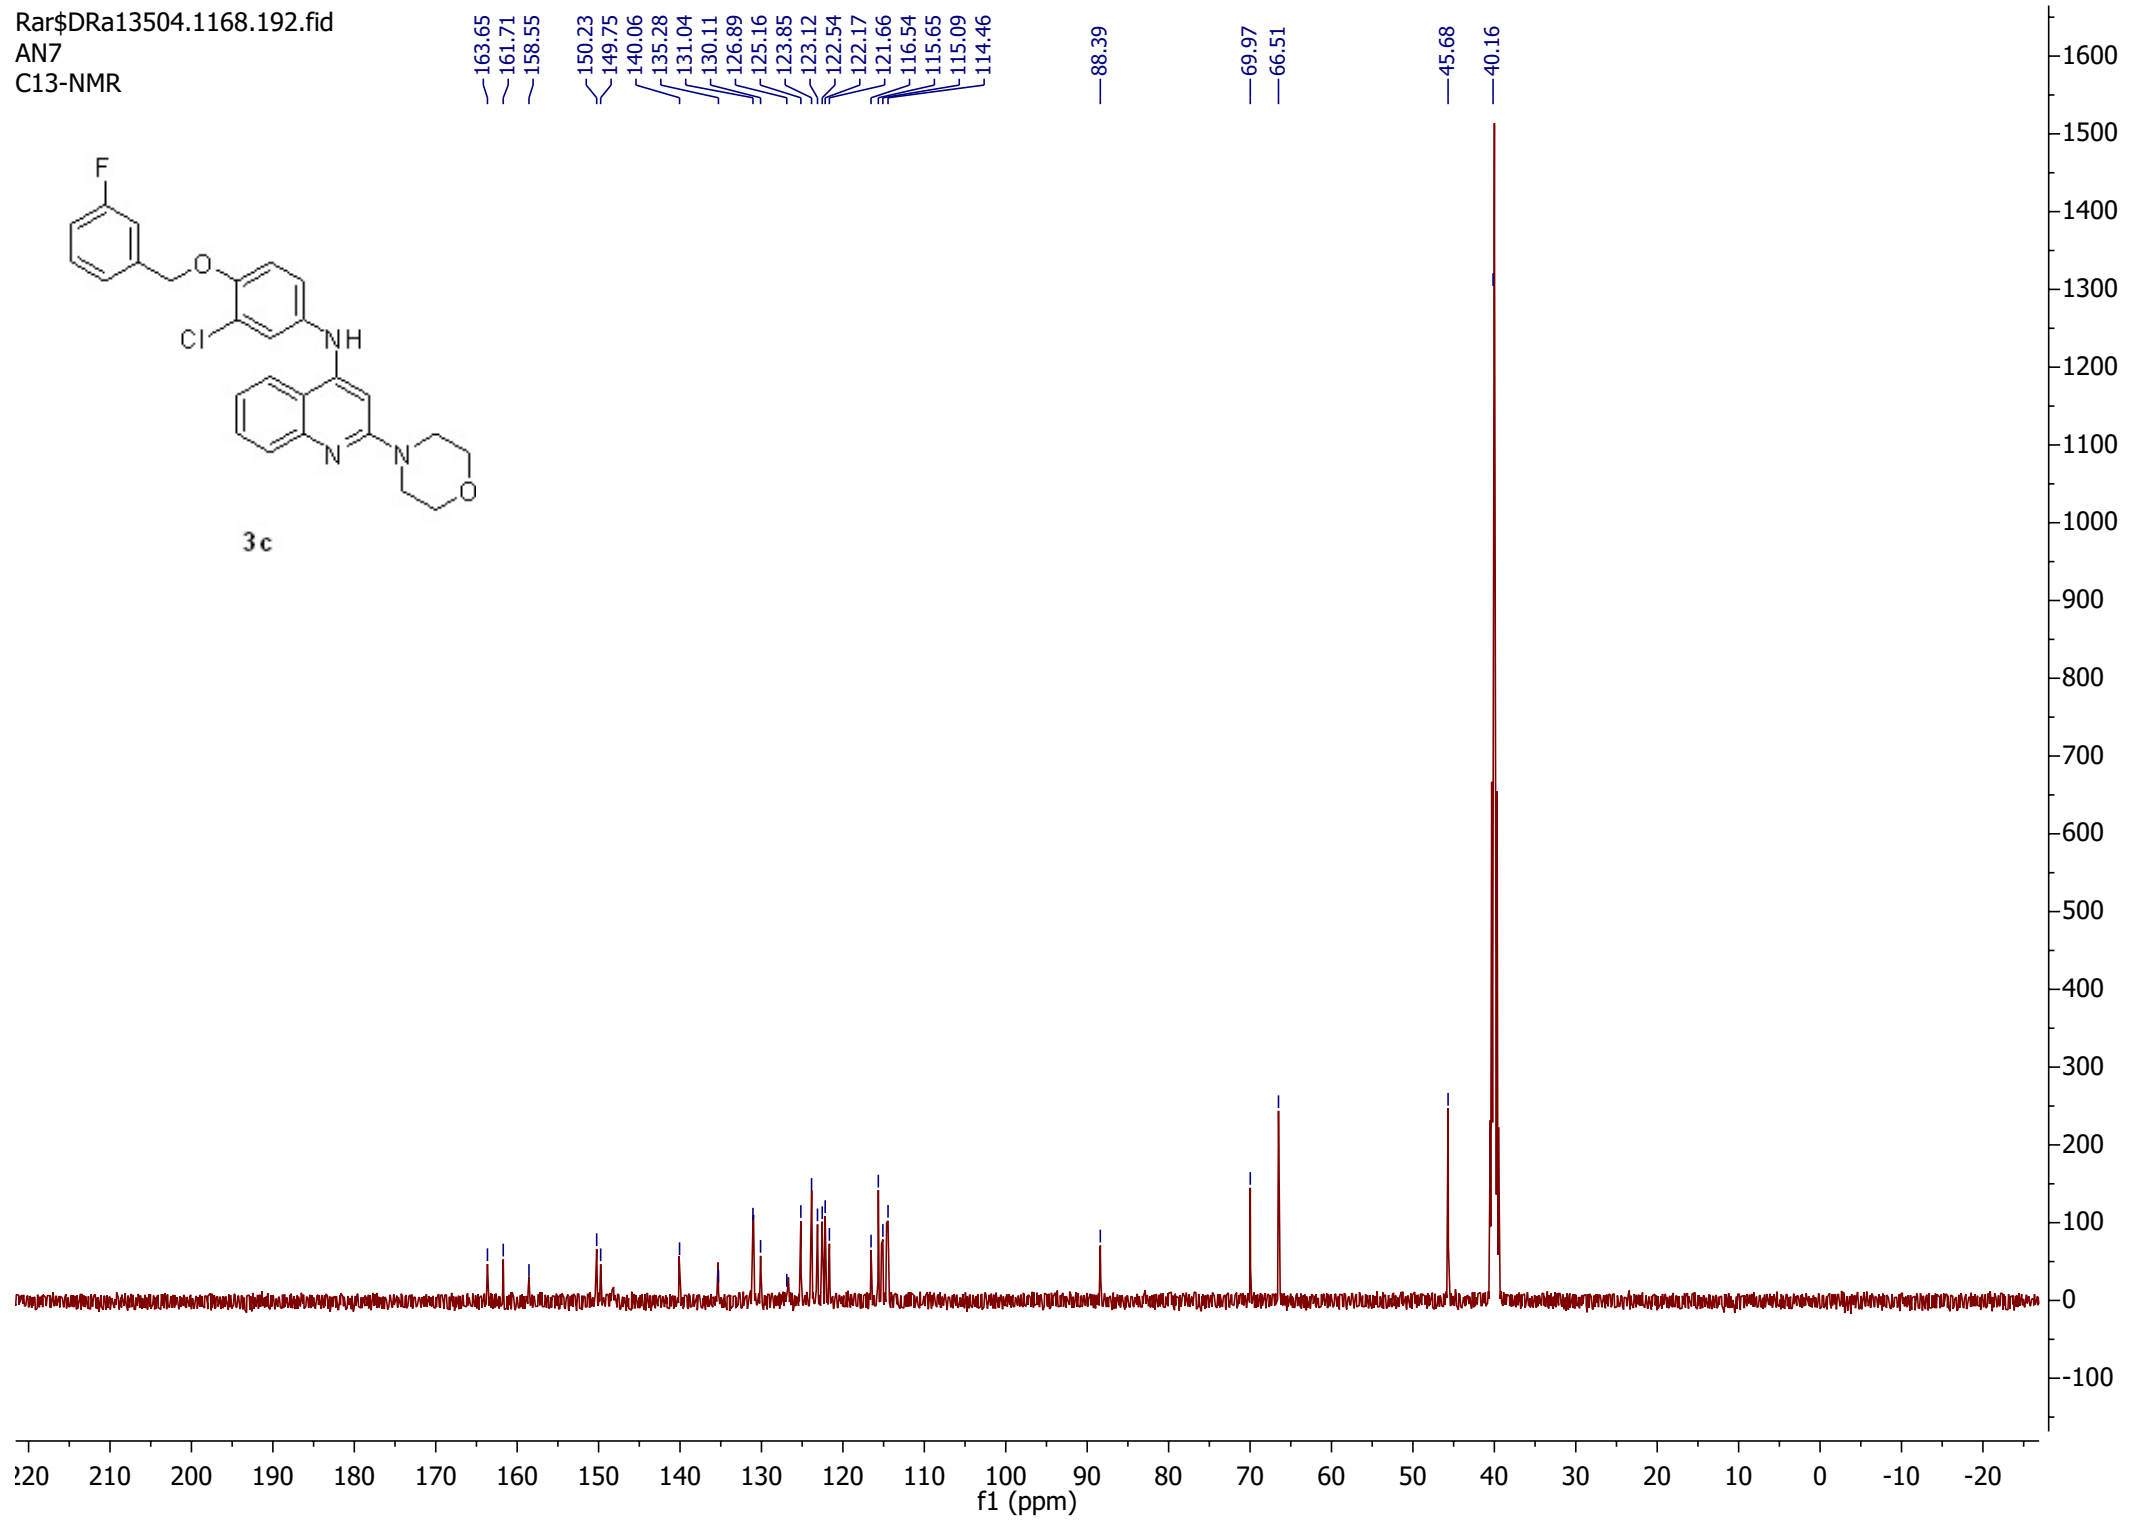



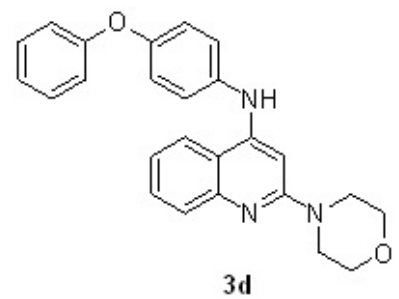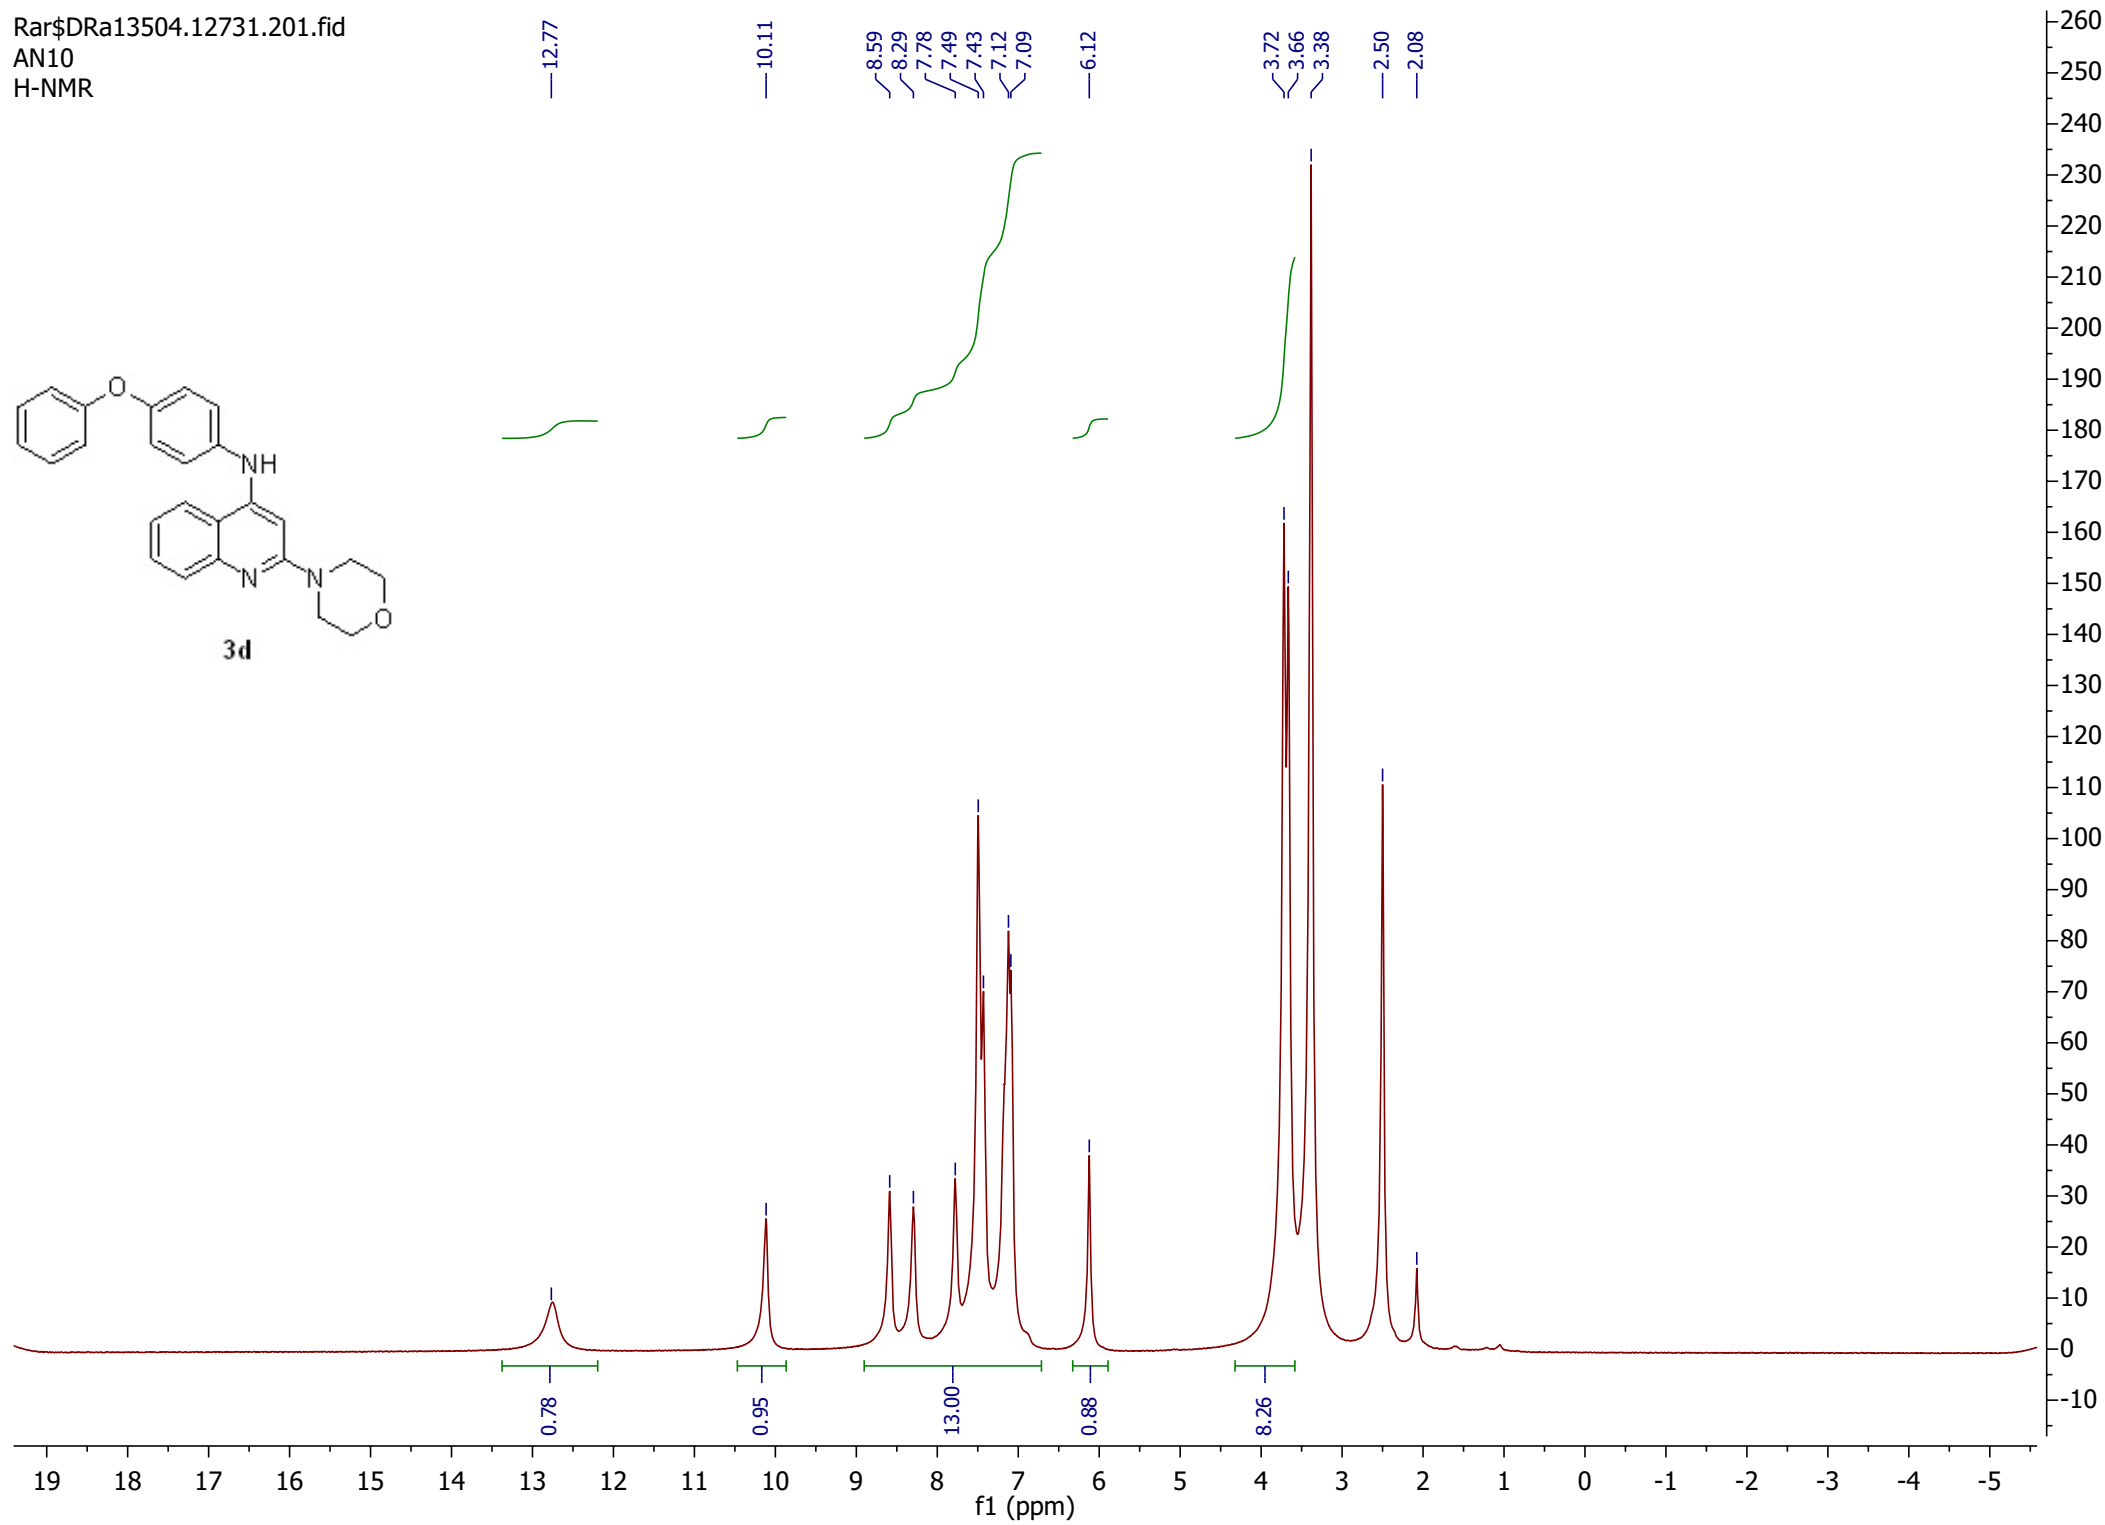

Rar\$DRa13504.11498.202.fid  
AN10  
C13-NMR

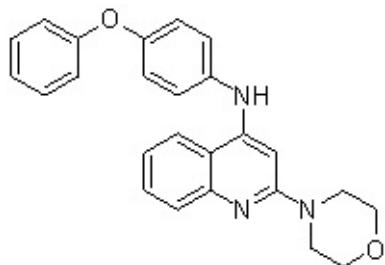

156.85  
155.20  
153.30  
138.48  
133.71  
133.01  
130.65  
127.13  
124.80  
124.26  
123.44  
119.95  
119.36  
114.70

85.35

65.94

47.08

40.32

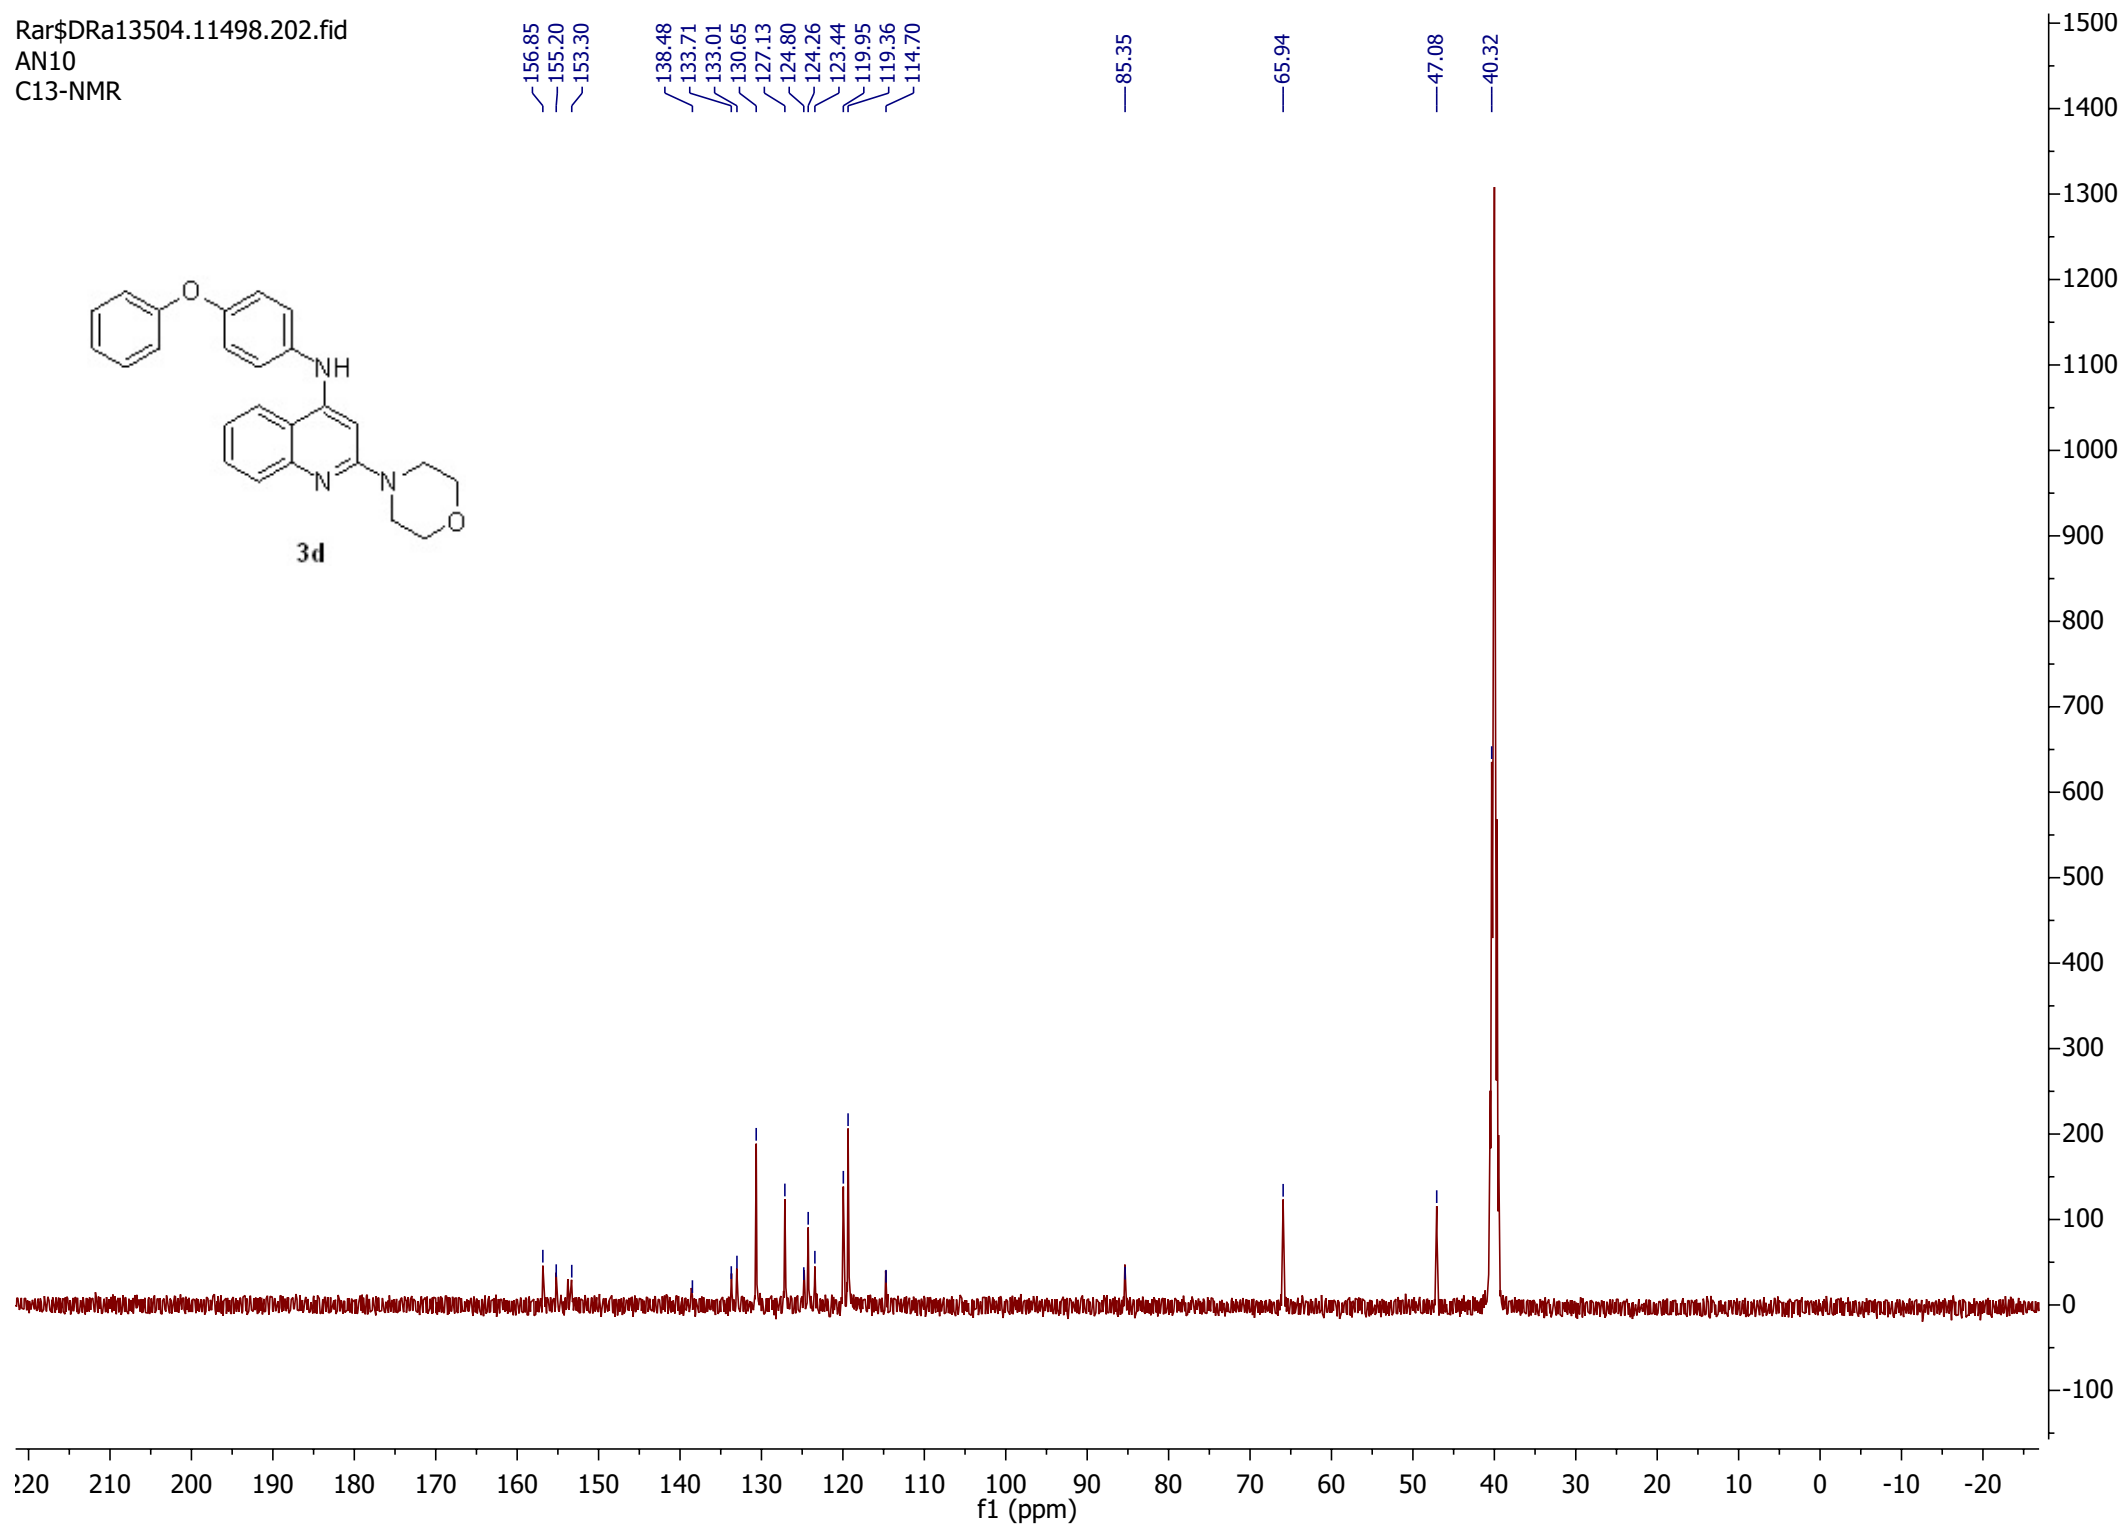

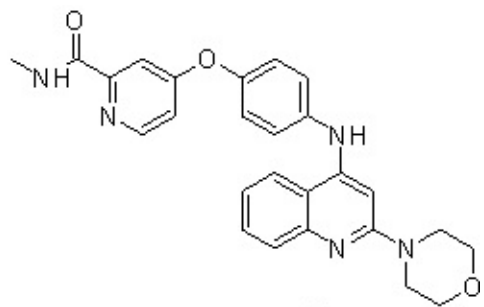

3e

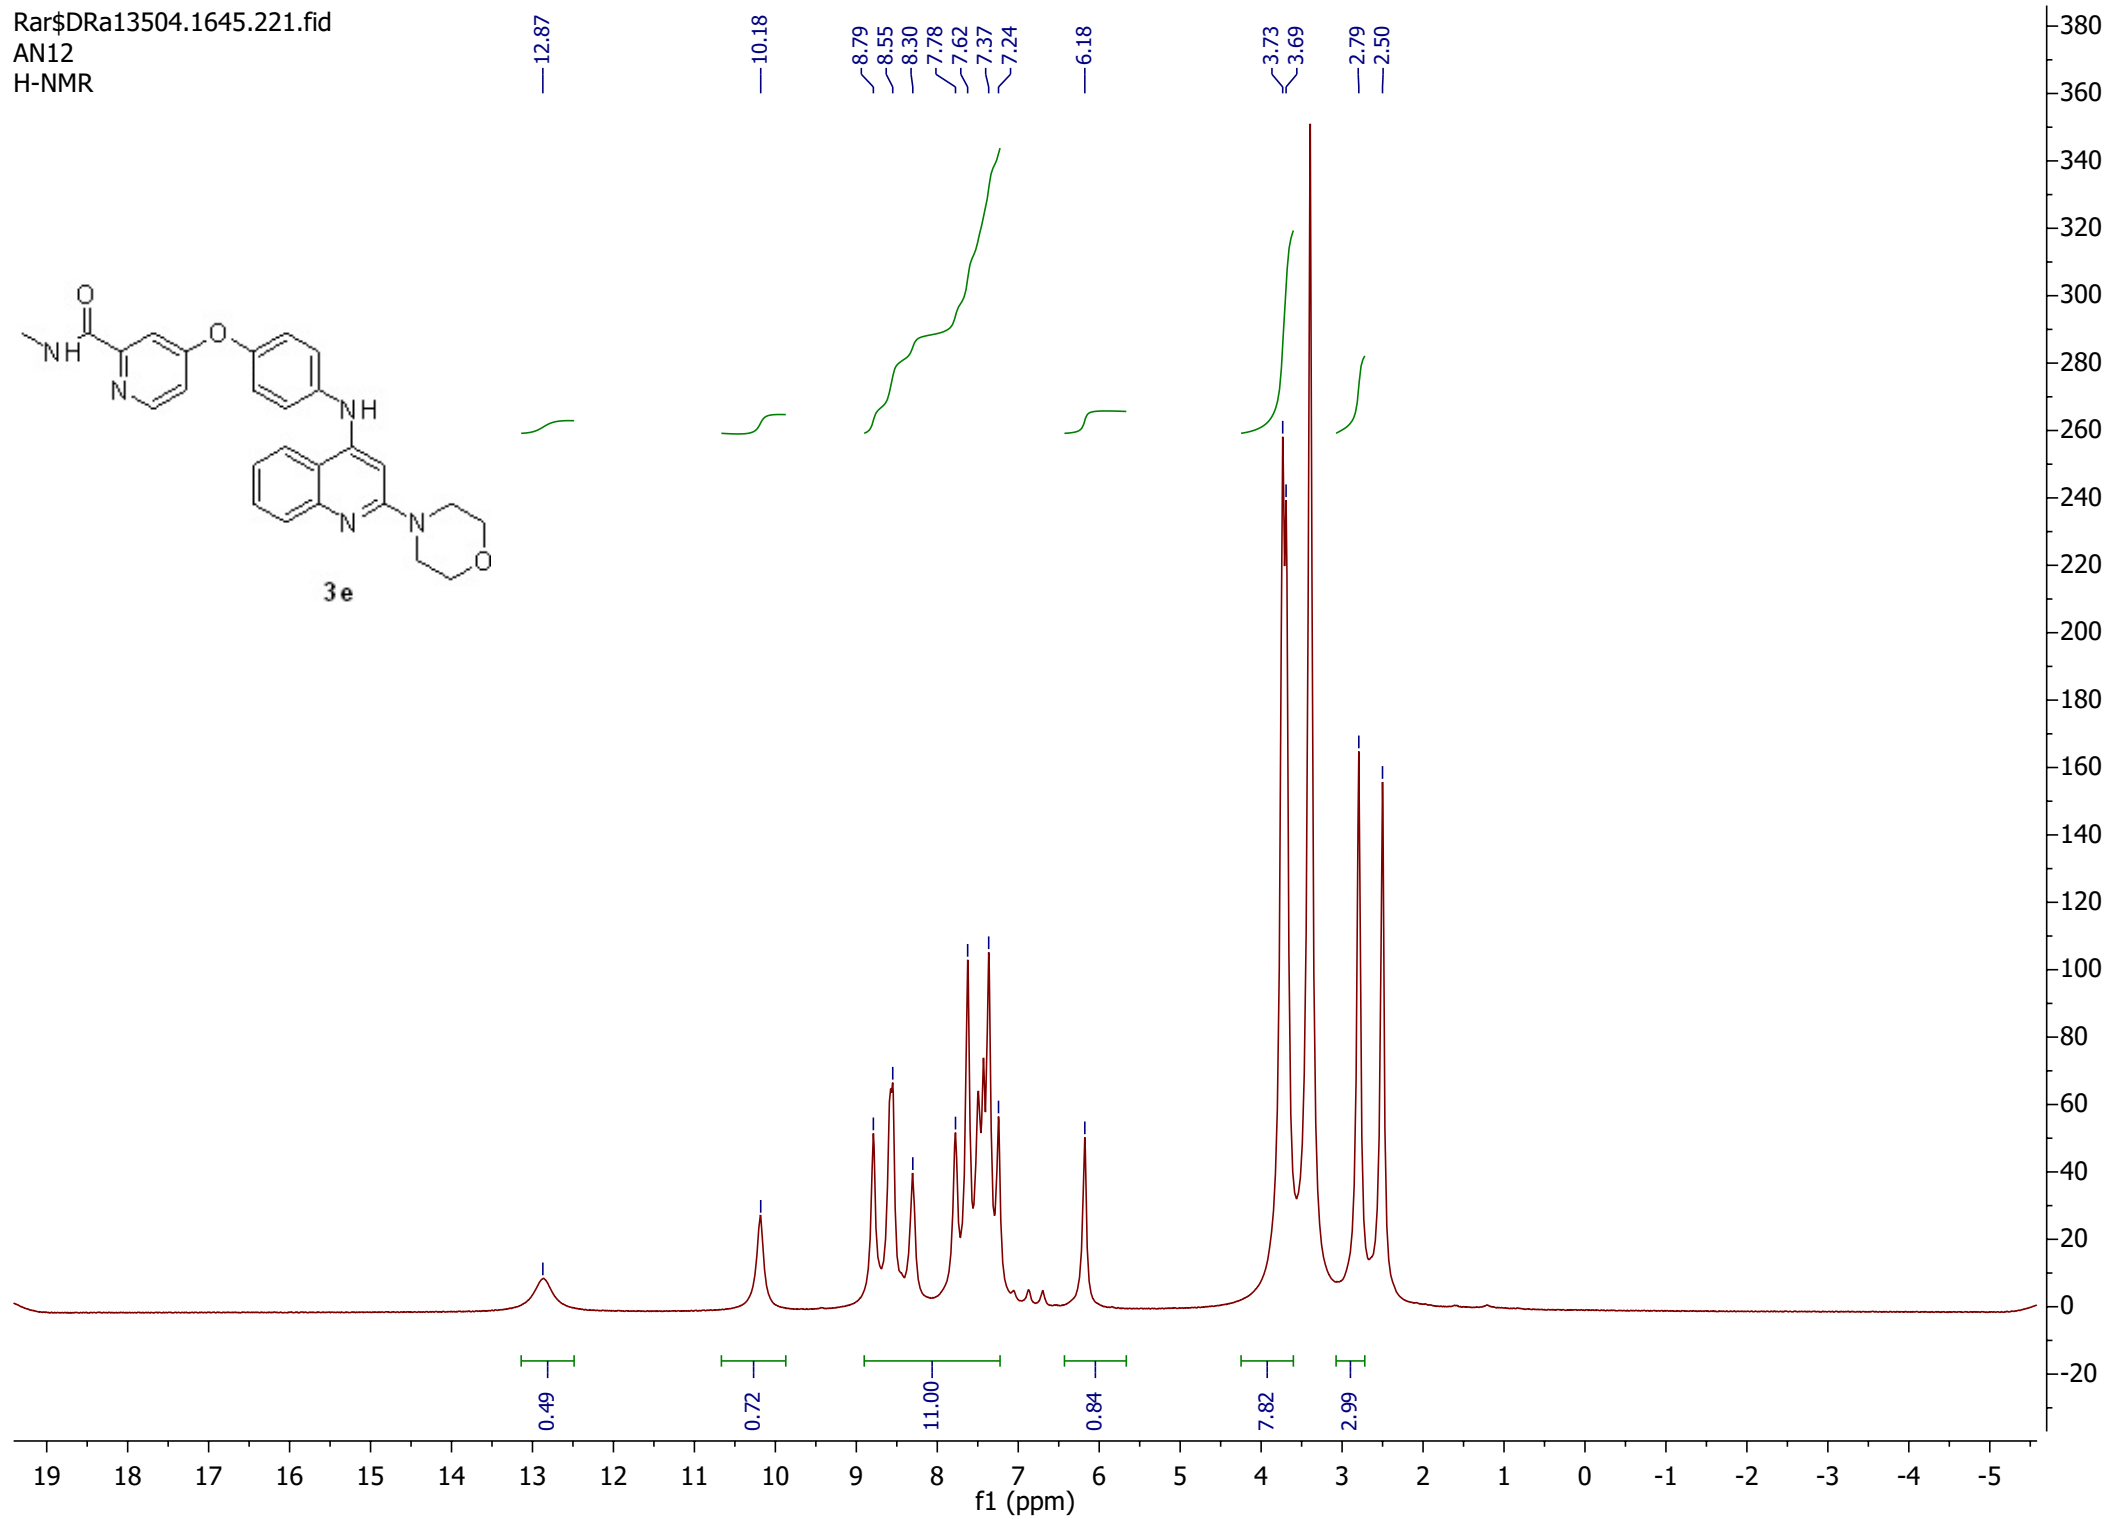

Rar\$DRa13504.36190.222.fid  
AN12  
C13-NMR

165.99  
164.24  
153.94  
152.98  
151.44  
151.41  
151.02  
136.46  
132.87  
127.38  
124.70  
124.65  
123.47  
122.77  
114.92  
109.44

86.00

66.02

47.07

40.32

26.50

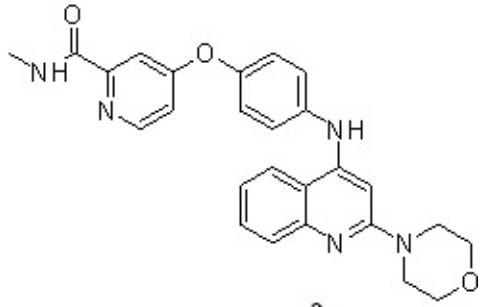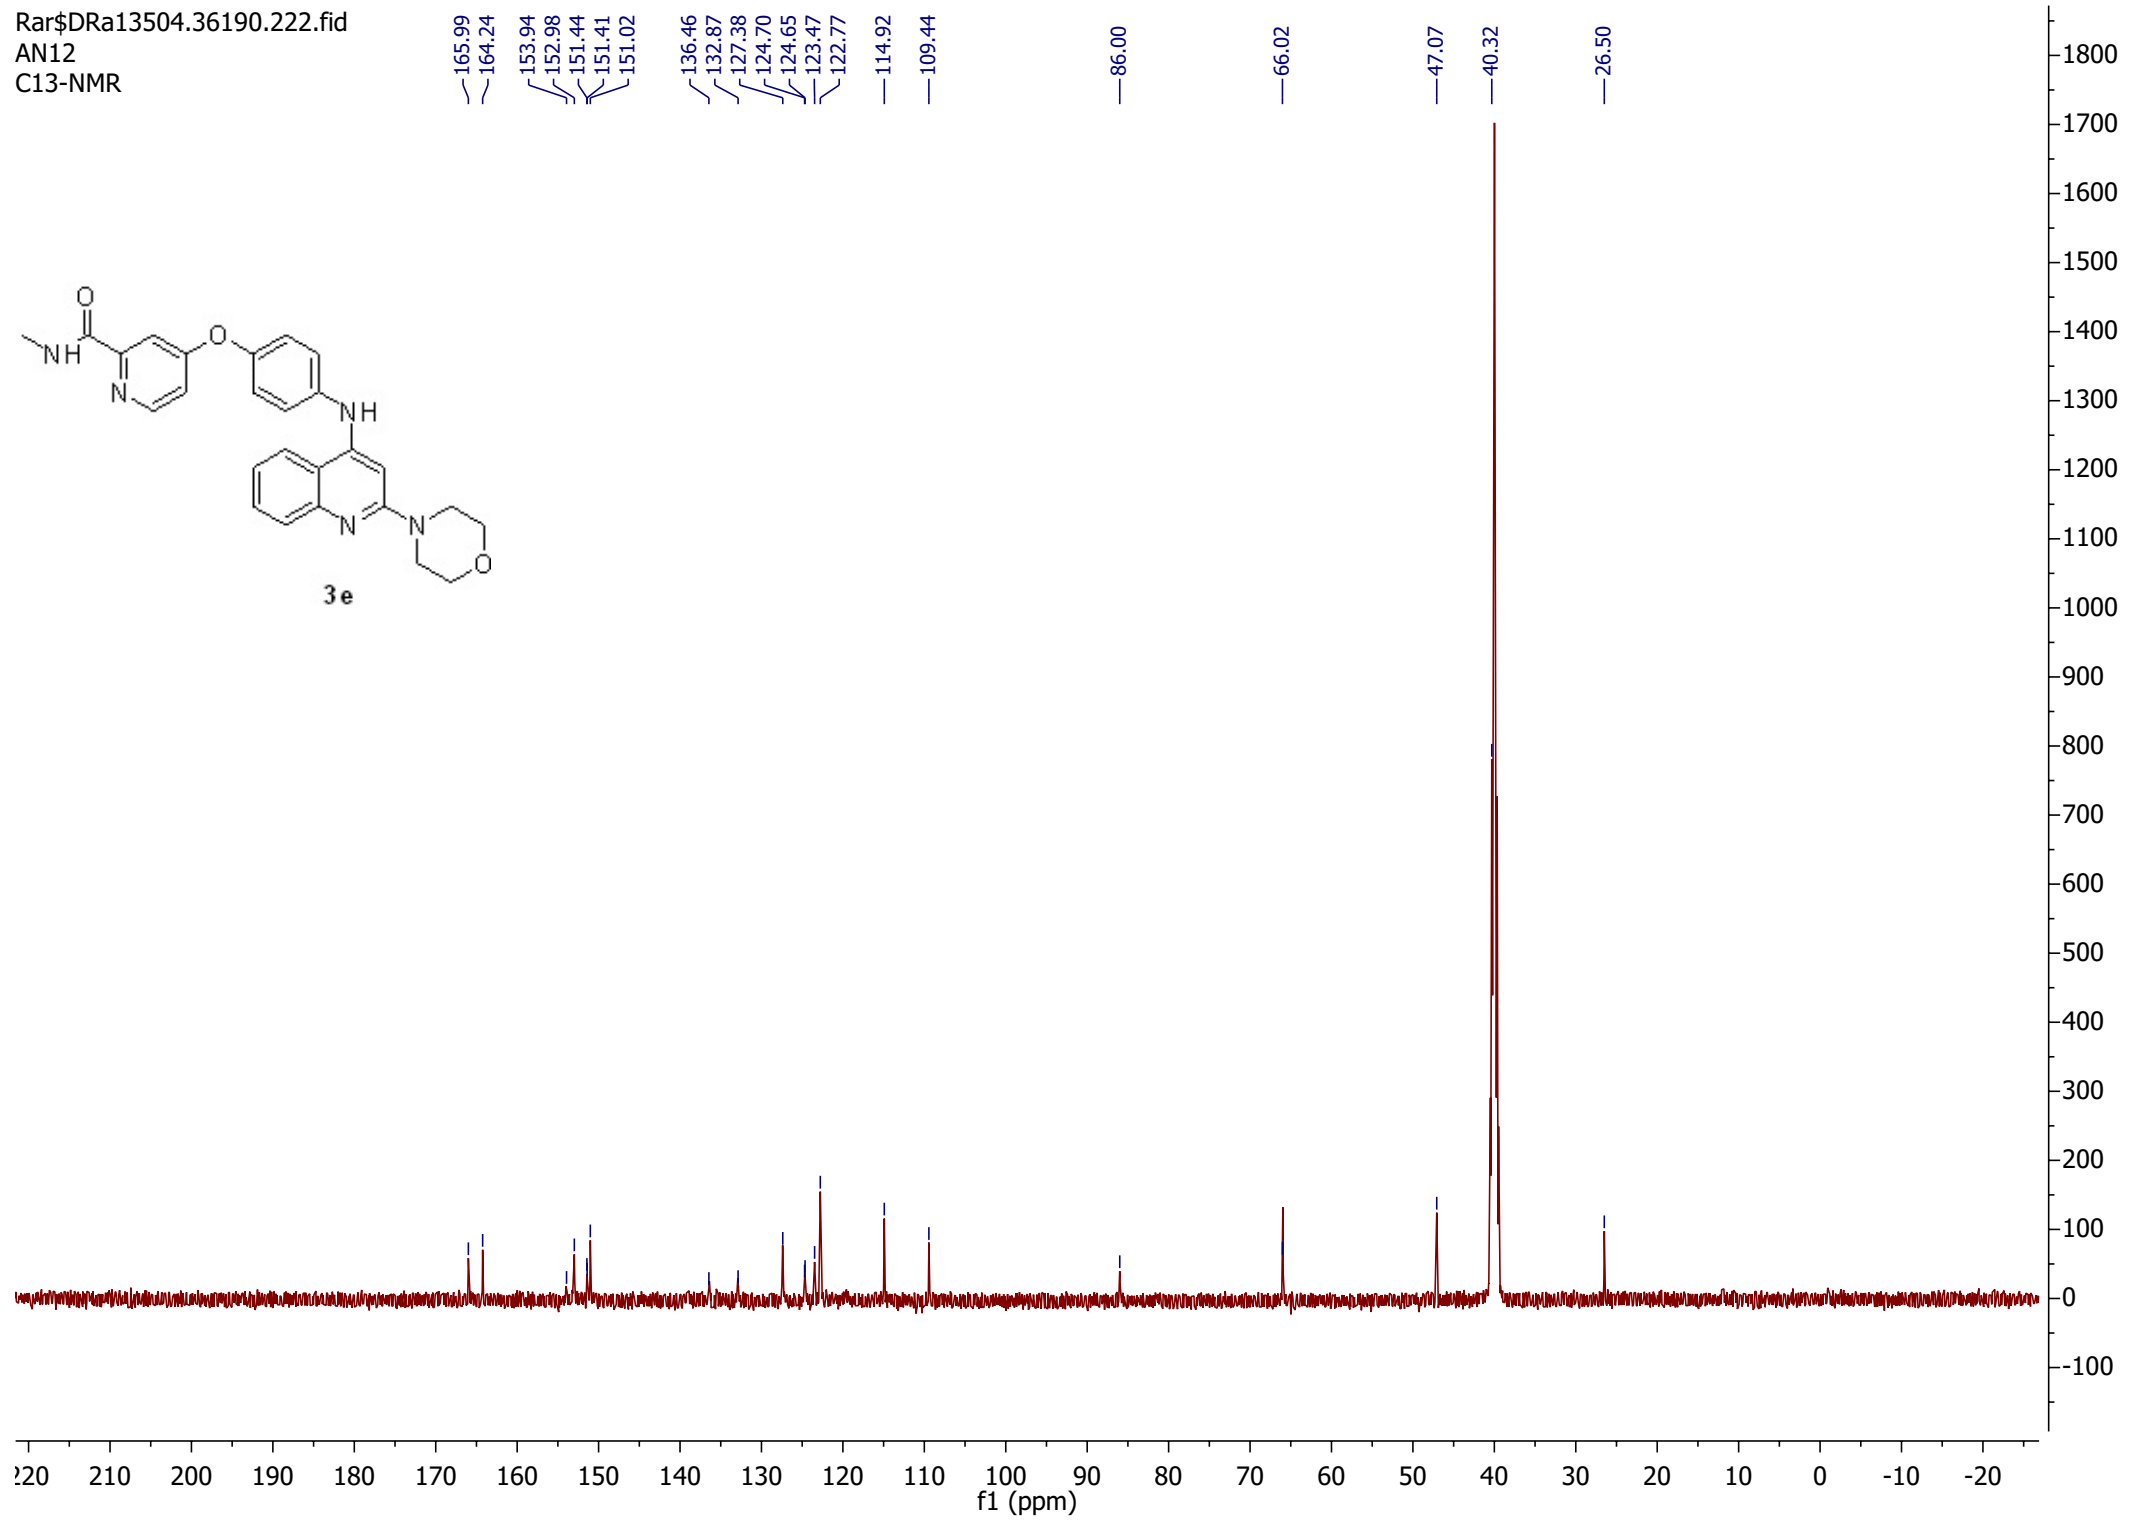

Supplement: d3ra07495a2.pdf [file d3ra07495a2.pdf]
